# Supplementary material for: CpG traffic lights are markers of regulatory regions in human genome
Source: PubMed Central journal article supplement (PMC6359853; doi:10.1186/s12864-018-5387-1), 2019-02-01
Supplement: 12864_2018_5387_MOESM1_ESM.pdf [file 12864_2018_5387_MOESM1_ESM.pdf]

## Supplementary materials

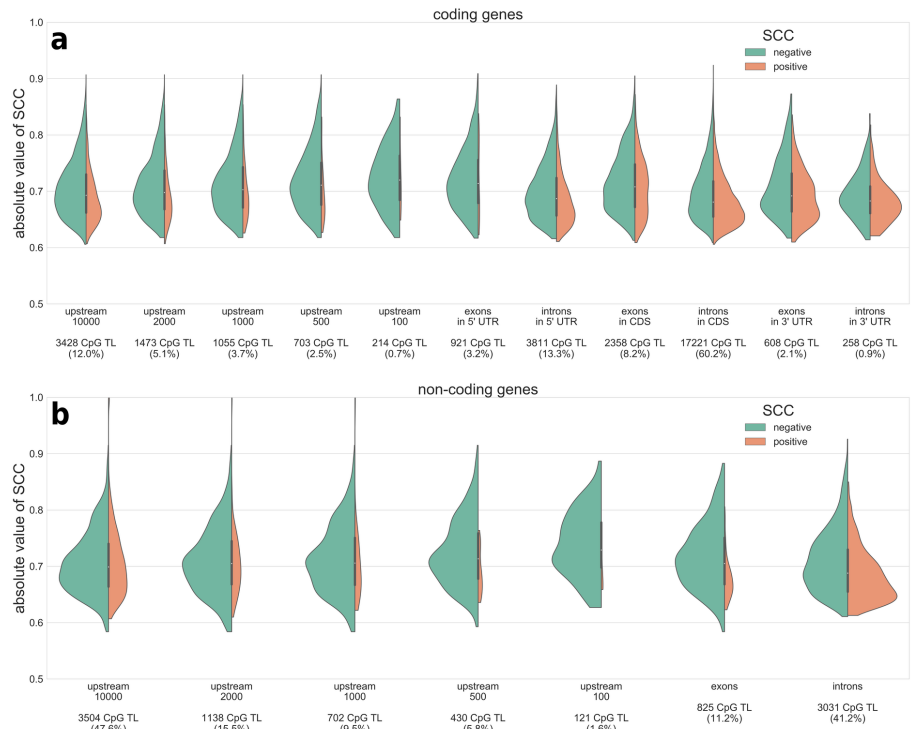

**Supplementary Figure S1. SCC of the CpG TL located in various gene regions** The total number of CpG TL in promoters, exons and introns are presented at the bottom. Green (left) / pink (right) parts of the violin plots show the distribution of positive and negative SCC, respectively. (a) protein coding genes, (b) non coding genes

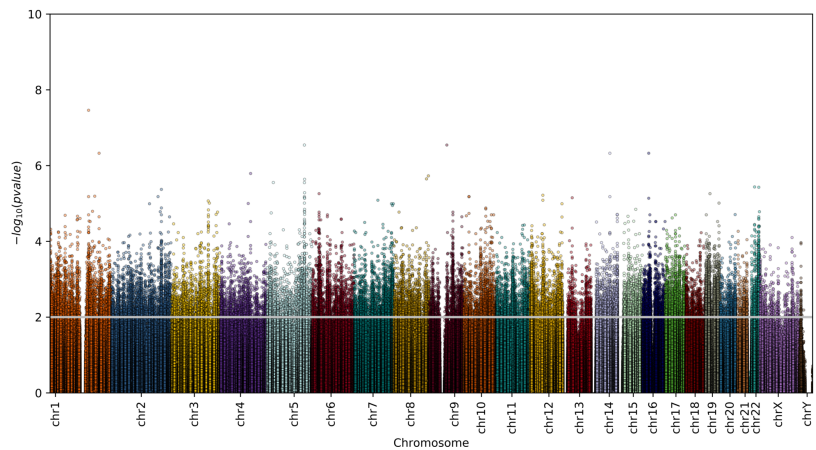

**Supplementary Figure S2. Distribution of CpG TLs along the genome.**

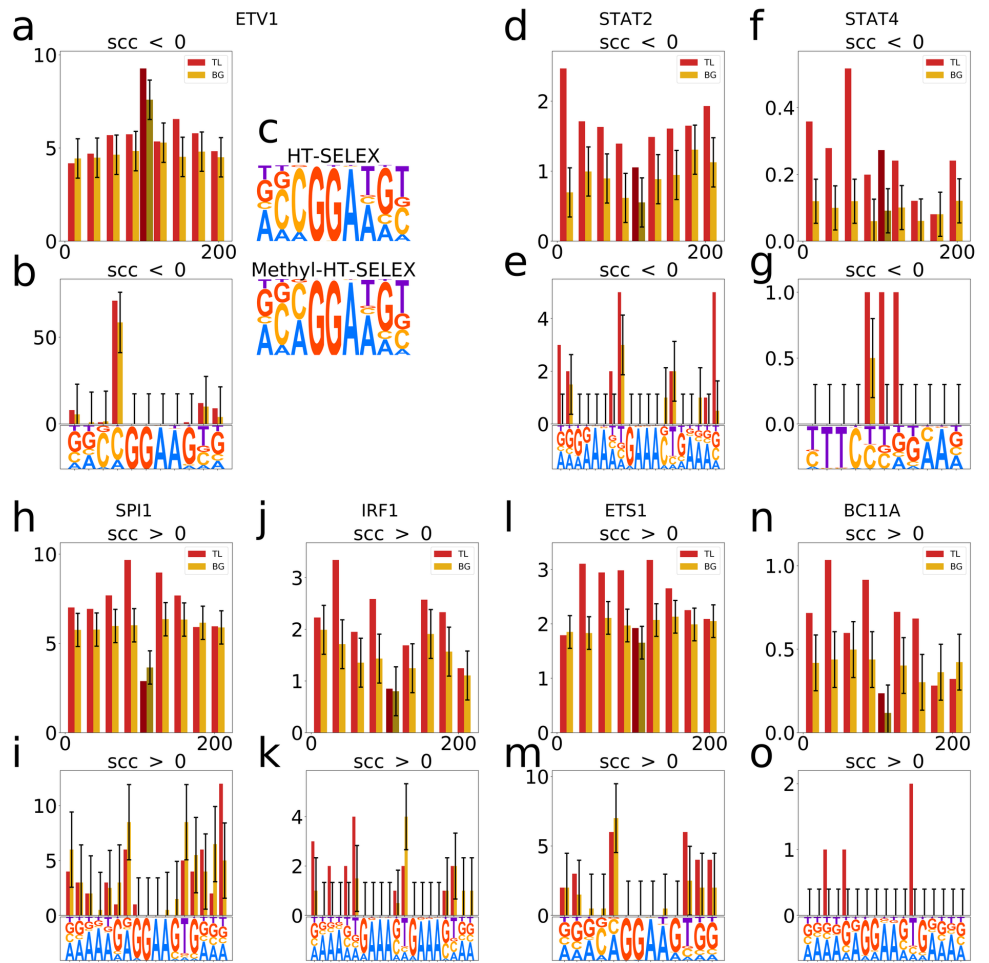

Supplementary Figure S3. TFBS

Supplementary Table S1. Number of significant SCC between average methylation of genomic region and gene expression. Permutation test (10 random shuffles of expression) compared to original data. Multiple testing correction was performed using Benjamini Hochberg FDR correction. Total number of genes = 59,396

| FDR    | number (averaged over 10 random shuffles) of genes with significant SCC between average promoter (-1000 ... +500) methylation and expression | number of genes with significant SCC between average promoter (-1000 ... +500) methylation and expression | fraction of genes with significant SCC between average promoter (-1000 ... +500) methylation and expression | number (averaged over 10 random shuffles) of genes with significant SCC between average gene body (+500 ... TTS) methylation and expression | number of genes with significant SCC between average gene body (+500 ... TTS) methylation and expression | fraction of genes with significant SCC between average gene body (+500 ... TTS) methylation and expression |
|--------|----------------------------------------------------------------------------------------------------------------------------------------------|-----------------------------------------------------------------------------------------------------------|-------------------------------------------------------------------------------------------------------------|---------------------------------------------------------------------------------------------------------------------------------------------|----------------------------------------------------------------------------------------------------------|------------------------------------------------------------------------------------------------------------|
| 0.0001 | 0.0 ± 0                                                                                                                                      | 95                                                                                                        | 1.6e-03                                                                                                     | 0.0 ± 0                                                                                                                                     | 61                                                                                                       | 1.0e-03                                                                                                    |
| 0.0002 | 0.0 ± 0                                                                                                                                      | 115                                                                                                       | 1.9e-03                                                                                                     | 0.0 ± 0                                                                                                                                     | 83                                                                                                       | 1.4e-03                                                                                                    |
| 0.0003 | 0.0 ± 0                                                                                                                                      | 140                                                                                                       | 2.4e-03                                                                                                     | 0.0 ± 0                                                                                                                                     | 103                                                                                                      | 1.7e-03                                                                                                    |
| 0.0004 | 0.0 ± 0                                                                                                                                      | 166                                                                                                       | 2.8e-03                                                                                                     | 0.0 ± 0                                                                                                                                     | 126                                                                                                      | 2.1e-03                                                                                                    |
| 0.0005 | 0.0 ± 0                                                                                                                                      | 188                                                                                                       | 3.2e-03                                                                                                     | 0.0 ± 0                                                                                                                                     | 136                                                                                                      | 2.3e-03                                                                                                    |
| 0.0006 | 0.0 ± 0                                                                                                                                      | 213                                                                                                       | 3.6e-03                                                                                                     | 0.0 ± 0                                                                                                                                     | 145                                                                                                      | 2.4e-03                                                                                                    |
| 0.0007 | 0.0 ± 0                                                                                                                                      | 227                                                                                                       | 3.8e-03                                                                                                     | 0.0 ± 0                                                                                                                                     | 157                                                                                                      | 2.6e-03                                                                                                    |
| 0.0008 | 0.0 ± 0                                                                                                                                      | 238                                                                                                       | 4.0e-03                                                                                                     | 0.0 ± 0                                                                                                                                     | 168                                                                                                      | 2.8e-03                                                                                                    |
| 0.0009 | 0.0 ± 0                                                                                                                                      | 248                                                                                                       | 4.2e-03                                                                                                     | 0.0 ± 0                                                                                                                                     | 174                                                                                                      | 2.9e-03                                                                                                    |
| 0.001  | 0.0 ± 0                                                                                                                                      | 263                                                                                                       | 4.4e-03                                                                                                     | 0.0 ± 0                                                                                                                                     | 186                                                                                                      | 3.1e-03                                                                                                    |
| 0.002  | 0.0 ± 0                                                                                                                                      | 367                                                                                                       | 6.2e-03                                                                                                     | 0.1 ± 0                                                                                                                                     | 284                                                                                                      | 4.8e-03                                                                                                    |
| 0.003  | 0.0 ± 0                                                                                                                                      | 445                                                                                                       | 7.5e-03                                                                                                     | 0.1 ± 0                                                                                                                                     | 357                                                                                                      | 6.0e-03                                                                                                    |
| 0.004  | 0.0 ± 0                                                                                                                                      | 488                                                                                                       | 8.2e-03                                                                                                     | 0.1 ± 0                                                                                                                                     | 445                                                                                                      | 7.5e-03                                                                                                    |
| 0.005  | 0.0 ± 0                                                                                                                                      | 537                                                                                                       | 9.0e-03                                                                                                     | 0.1 ± 0                                                                                                                                     | 505                                                                                                      | 8.5e-03                                                                                                    |
| 0.006  | 0.0 ± 0                                                                                                                                      | 585                                                                                                       | 9.8e-03                                                                                                     | 0.1 ± 0                                                                                                                                     | 563                                                                                                      | 9.5e-03                                                                                                    |
| 0.007  | 0.0 ± 0                                                                                                                                      | 629                                                                                                       | 1.1e-02                                                                                                     | 0.1 ± 0                                                                                                                                     | 608                                                                                                      | 1.0e-02                                                                                                    |
| 0.008  | 0.0 ± 0                                                                                                                                      | 669                                                                                                       | 1.1e-02                                                                                                     | 0.1 ± 0                                                                                                                                     | 641                                                                                                      | 1.1e-02                                                                                                    |
| 0.009  | 0.0 ± 0                                                                                                                                      | 712                                                                                                       | 1.2e-02                                                                                                     | 0.1 ± 0                                                                                                                                     | 703                                                                                                      | 1.2e-02                                                                                                    |
| 0.01   | 0.0 ± 0                                                                                                                                      | 764                                                                                                       | 1.3e-02                                                                                                     | 0.1 ± 0                                                                                                                                     | 762                                                                                                      | 1.3e-02                                                                                                    |
| 0.02   | 0.0 ± 0                                                                                                                                      | 1133                                                                                                      | 1.9e-02                                                                                                     | 0.1 ± 0                                                                                                                                     | 1167                                                                                                     | 2.0e-02                                                                                                    |
| 0.03   | 0.0 ± 0                                                                                                                                      | 1473                                                                                                      | 2.5e-02                                                                                                     | 0.1 ± 0                                                                                                                                     | 1486                                                                                                     | 2.5e-02                                                                                                    |
| 0.04   | 0.0 ± 0                                                                                                                                      | 1761                                                                                                      | 3.0e-02                                                                                                     | 0.2 ± 0                                                                                                                                     | 1772                                                                                                     | 3.0e-02                                                                                                    |
| 0.05   | 0.0 ± 0                                                                                                                                      | 2038                                                                                                      | 3.4e-02                                                                                                     | 0.2 ± 0                                                                                                                                     | 2125                                                                                                     | 3.6e-02                                                                                                    |
| 0.06   | 0.0 ± 0                                                                                                                                      | 2327                                                                                                      | 3.9e-02                                                                                                     | 0.2 ± 0                                                                                                                                     | 2349                                                                                                     | 4.0e-02                                                                                                    |
| 0.07   | 0.0 ± 0                                                                                                                                      | 2546                                                                                                      | 4.3e-02                                                                                                     | 0.2 ± 0                                                                                                                                     | 2618                                                                                                     | 4.4e-02                                                                                                    |
| 0.08   | 0.1 ± 0                                                                                                                                      | 2783                                                                                                      | 4.7e-02                                                                                                     | 0.2 ± 0                                                                                                                                     | 2857                                                                                                     | 4.8e-02                                                                                                    |
| 0.09   | 0.1 ± 0                                                                                                                                      | 3008                                                                                                      | 5.1e-02                                                                                                     | 0.2 ± 0                                                                                                                                     | 3122                                                                                                     | 5.3e-02                                                                                                    |
| 0.1    | 0.1 ± 0                                                                                                                                      | 3251                                                                                                      | 5.5e-02                                                                                                     | 0.2 ± 0                                                                                                                                     | 3401                                                                                                     | 5.7e-02                                                                                                    |
| 0.2    | 0.4 ± 1                                                                                                                                      | 6087                                                                                                      | 1.0e-01                                                                                                     | 0.2 ± 0                                                                                                                                     | 5941                                                                                                     | 1.0e-01                                                                                                    |
| 0.3    | 0.4 ± 1                                                                                                                                      | 9424                                                                                                      | 1.6e-01                                                                                                     | 0.3 ± 1                                                                                                                                     | 8761                                                                                                     | 1.5e-01                                                                                                    |
| 0.4    | 1.3 ± 2                                                                                                                                      | 13023                                                                                                     | 2.2e-01                                                                                                     | 1.0 ± 2                                                                                                                                     | 11667                                                                                                    | 2.0e-01                                                                                                    |
| 0.5    | 3.4 ± 3                                                                                                                                      | 17901                                                                                                     | 3.0e-01                                                                                                     | 2.1 ± 3                                                                                                                                     | 15063                                                                                                    | 2.5e-01                                                                                                    |
| 0.6    | 6.2 ± 5                                                                                                                                      | 22907                                                                                                     | 3.9e-01                                                                                                     | 5.0 ± 6                                                                                                                                     | 18932                                                                                                    | 3.2e-01                                                                                                    |
| 0.7    | 9.7 ± 9                                                                                                                                      | 28940                                                                                                     | 4.9e-01                                                                                                     | 13.1 ± 15                                                                                                                                   | 22993                                                                                                    | 3.9e-01                                                                                                    |

|     |               |       |         |                 |       |         |
|-----|---------------|-------|---------|-----------------|-------|---------|
| 0.8 | 30.0 ± 27     | 35739 | 6.0e-01 | 39.0 ± 34       | 27577 | 4.6e-01 |
| 0.9 | 109.0 ± 116   | 44164 | 7.4e-01 | 138.1 ± 120     | 33274 | 5.6e-01 |
| 1.0 | 6651.9 ± 9652 | 54828 | 9.2e-01 | 13166.3 ± 12753 | 40835 | 6.9e-01 |

**Supplementary Table S2.** Number of significant SCC between CpG methylation and gene expression. Permutation test (10 random shuffles of expression) compared to original data. Multiple testing correction was performed using Benjamini Hochberg FDR correction. Total number of CpG gene pairs = 25,813,295

| FDR    | number (averaged over 10 random shuffles) of CpG-gene pairs with significant SCC between methylation and expression | number of CpG-gene pairs with significant SCC | fraction of CpG-gene pairs number (averaged over 10 random shuffles) with significant SCC between methylation and expression | fraction of CpG-gene pairs with significant SCC between methylation and expression | number of genes (averaged over 10 random shuffles) with at least one significant SCC between any close CpG ans gene expression | number of genes with at least one significant SCC between any close CpG ans gene expression |
|--------|---------------------------------------------------------------------------------------------------------------------|-----------------------------------------------|------------------------------------------------------------------------------------------------------------------------------|------------------------------------------------------------------------------------|--------------------------------------------------------------------------------------------------------------------------------|---------------------------------------------------------------------------------------------|
| 0.0001 | 19.2 ± 5                                                                                                            | 340                                           | 7.4e-07                                                                                                                      | 1.3e-05                                                                            | 13.6 ± 2                                                                                                                       | 196                                                                                         |
| 0.0002 | 19.3 ± 6                                                                                                            | 714                                           | 7.5e-07                                                                                                                      | 2.8e-05                                                                            | 13.7 ± 3                                                                                                                       | 375                                                                                         |
| 0.0003 | 19.4 ± 5                                                                                                            | 1117                                          | 7.5e-07                                                                                                                      | 4.3e-05                                                                            | 13.8 ± 3                                                                                                                       | 527                                                                                         |
| 0.0004 | 19.5 ± 5                                                                                                            | 1491                                          | 7.6e-07                                                                                                                      | 5.8e-05                                                                            | 13.9 ± 3                                                                                                                       | 671                                                                                         |
| 0.0005 | 19.7 ± 6                                                                                                            | 1882                                          | 7.6e-07                                                                                                                      | 7.3e-05                                                                            | 14.1 ± 3                                                                                                                       | 817                                                                                         |
| 0.0006 | 19.8 ± 6                                                                                                            | 2325                                          | 7.7e-07                                                                                                                      | 9.0e-05                                                                            | 14.2 ± 3                                                                                                                       | 974                                                                                         |
| 0.0007 | 19.8 ± 6                                                                                                            | 2712                                          | 7.7e-07                                                                                                                      | 1.1e-04                                                                            | 14.2 ± 3                                                                                                                       | 1113                                                                                        |
| 0.0008 | 19.8 ± 6                                                                                                            | 3104                                          | 7.7e-07                                                                                                                      | 1.2e-04                                                                            | 14.2 ± 3                                                                                                                       | 1244                                                                                        |
| 0.0009 | 20.0 ± 6                                                                                                            | 3452                                          | 7.7e-07                                                                                                                      | 1.3e-04                                                                            | 14.4 ± 3                                                                                                                       | 1360                                                                                        |
| 0.001  | 20.1 ± 6                                                                                                            | 3774                                          | 7.8e-07                                                                                                                      | 1.5e-04                                                                            | 14.5 ± 3                                                                                                                       | 1463                                                                                        |
| 0.002  | 20.5 ± 6                                                                                                            | 7754                                          | 7.9e-07                                                                                                                      | 3.0e-04                                                                            | 14.9 ± 4                                                                                                                       | 2524                                                                                        |
| 0.003  | 20.8 ± 7                                                                                                            | 11290                                         | 8.1e-07                                                                                                                      | 4.4e-04                                                                            | 15.1 ± 4                                                                                                                       | 3361                                                                                        |
| 0.004  | 20.9 ± 7                                                                                                            | 14888                                         | 8.1e-07                                                                                                                      | 5.8e-04                                                                            | 15.2 ± 4                                                                                                                       | 4152                                                                                        |
| 0.005  | 21.1 ± 7                                                                                                            | 18377                                         | 8.2e-07                                                                                                                      | 7.1e-04                                                                            | 15.4 ± 4                                                                                                                       | 4905                                                                                        |
| 0.006  | 21.4 ± 7                                                                                                            | 22172                                         | 8.3e-07                                                                                                                      | 8.6e-04                                                                            | 15.6 ± 4                                                                                                                       | 5623                                                                                        |
| 0.007  | 21.5 ± 7                                                                                                            | 25670                                         | 8.3e-07                                                                                                                      | 9.9e-04                                                                            | 15.7 ± 4                                                                                                                       | 6263                                                                                        |
| 0.008  | 21.5 ± 7                                                                                                            | 29116                                         | 8.3e-07                                                                                                                      | 1.1e-03                                                                            | 15.7 ± 4                                                                                                                       | 6901                                                                                        |
| 0.009  | 21.6 ± 7                                                                                                            | 32538                                         | 8.4e-07                                                                                                                      | 1.3e-03                                                                            | 15.8 ± 4                                                                                                                       | 7474                                                                                        |
| 0.01   | 22.0 ± 6                                                                                                            | 35918                                         | 8.5e-07                                                                                                                      | 1.4e-03                                                                            | 16.2 ± 4                                                                                                                       | 7997                                                                                        |
| 0.02   | 24.1 ± 7                                                                                                            | 71741                                         | 9.3e-07                                                                                                                      | 2.8e-03                                                                            | 18.2 ± 4                                                                                                                       | 12852                                                                                       |
| 0.03   | 26.1 ± 7                                                                                                            | 109005                                        | 1.0e-06                                                                                                                      | 4.2e-03                                                                            | 20.1 ± 4                                                                                                                       | 16604                                                                                       |
| 0.04   | 26.9 ± 8                                                                                                            | 148339                                        | 1.0e-06                                                                                                                      | 5.7e-03                                                                            | 20.9 ± 5                                                                                                                       | 19930                                                                                       |
| 0.05   | 27.8 ± 8                                                                                                            | 189990                                        | 1.1e-06                                                                                                                      | 7.4e-03                                                                            | 21.8 ± 5                                                                                                                       | 22957                                                                                       |
| 0.06   | 28.2 ± 7                                                                                                            | 232923                                        | 1.1e-06                                                                                                                      | 9.0e-03                                                                            | 22.2 ± 5                                                                                                                       | 25629                                                                                       |

|      |                |          |         |         |                |       |
|------|----------------|----------|---------|---------|----------------|-------|
| 0.07 | 29.9 ± 8       | 278708   | 1.2e-06 | 1.1e-02 | 23.8 ± 6       | 28117 |
| 0.08 | 30.8 ± 9       | 325107   | 1.2e-06 | 1.3e-02 | 24.7 ± 6       | 30263 |
| 0.09 | 32.6 ± 9       | 374732   | 1.3e-06 | 1.5e-02 | 26.4 ± 6       | 32304 |
| 0.1  | 33.7 ± 9       | 425413   | 1.3e-06 | 1.6e-02 | 27.5 ± 6       | 34095 |
| 0.2  | 50.7 ± 16      | 1056473  | 2.0e-06 | 4.1e-02 | 43.6 ± 13      | 46819 |
| 0.3  | 81.0 ± 34      | 1935953  | 3.1e-06 | 7.5e-02 | 72.4 ± 26      | 52918 |
| 0.4  | 149.3 ± 66     | 3126752  | 5.8e-06 | 1.2e-01 | 135.7 ± 55     | 55670 |
| 0.5  | 310.7 ± 103    | 4671655  | 1.2e-05 | 1.8e-01 | 281.8 ± 86     | 56966 |
| 0.6  | 761.8 ± 121    | 6896109  | 3.0e-05 | 2.7e-01 | 673.6 ± 97     | 57953 |
| 0.7  | 1882.3 ± 431   | 9648189  | 7.3e-05 | 3.7e-01 | 1564.3 ± 324   | 58123 |
| 0.8  | 5544.2 ± 1276  | 13160124 | 2.1e-04 | 5.1e-01 | 4046.6 ± 735   | 58195 |
| 0.9  | 19904.1 ± 4895 | 17783535 | 7.7e-04 | 6.9e-01 | 10938.0 ± 1750 | 58240 |

**Supplementary Table S3.** Number of significant SCC between gene expression and average methylation of the genome region

| region        | 0.001 | 0.005 | 0.01 | 0.05 | 0.1  |
|---------------|-------|-------|------|------|------|
| -10000...TSS  | 46    | 159   | 284  | 1246 | 2376 |
| -10000...+50  | 48    | 163   | 284  | 1206 | 2336 |
| -10000...+100 | 56    | 159   | 275  | 1169 | 2269 |
| -10000...+200 | 55    | 163   | 265  | 1130 | 2252 |
| -10000...+300 | 52    | 155   | 247  | 1102 | 2176 |
| -10000...+500 | 55    | 163   | 261  | 1100 | 2179 |
| -5000...TSS   | 64    | 224   | 335  | 1170 | 2174 |
| -5000...+50   | 79    | 225   | 327  | 1107 | 2151 |
| -5000...+100  | 78    | 230   | 323  | 1135 | 2134 |
| -5000...+200  | 80    | 234   | 321  | 1150 | 2197 |
| -5000...+300  | 88    | 233   | 307  | 1202 | 2217 |
| -5000...+500  | 94    | 237   | 337  | 1232 | 2289 |
| -2000...TSS   | 124   | 298   | 424  | 1405 | 2457 |
| -2000...+50   | 134   | 313   | 479  | 1432 | 2446 |
| -2000...+100  | 148   | 321   | 489  | 1441 | 2465 |
| -2000...+200  | 137   | 354   | 545  | 1509 | 2538 |
| -2000...+300  | 147   | 380   | 568  | 1553 | 2620 |
| -2000...+500  | 179   | 429   | 618  | 1713 | 2738 |
| -1000...TSS   | 132   | 339   | 535  | 1497 | 2629 |
| -1000...+50   | 166   | 384   | 570  | 1573 | 2771 |
| -1000...+100  | 168   | 406   | 573  | 1644 | 2802 |
| -1000...+200  | 194   | 428   | 630  | 1733 | 2893 |
| -1000...+300  | 200   | 462   | 686  | 1819 | 3072 |
| -1000...+500  | 263   | 537   | 764  | 2038 | 3251 |
| -500...TSS    | 146   | 344   | 500  | 1392 | 2408 |
| -500...+50    | 160   | 383   | 548  | 1497 | 2599 |
| -500...+100   | 166   | 413   | 585  | 1581 | 2710 |

|             |     |     |     |      |      |
|-------------|-----|-----|-----|------|------|
| -500...+200 | 214 | 450 | 634 | 1743 | 2889 |
| -500...+300 | 229 | 487 | 685 | 1830 | 3016 |
| -500...+500 | 292 | 586 | 834 | 2076 | 3431 |
| -400...TSS  | 131 | 330 | 460 | 1322 | 2251 |
| -400...+50  | 162 | 372 | 508 | 1394 | 2486 |
| -400...+100 | 178 | 418 | 550 | 1462 | 2553 |
| -400...+200 | 220 | 469 | 611 | 1633 | 2782 |
| -400...+300 | 239 | 508 | 696 | 1784 | 2983 |
| -400...+500 | 302 | 601 | 818 | 2076 | 3366 |
| -300...TSS  | 143 | 288 | 415 | 1204 | 2028 |
| -300...+50  | 154 | 352 | 465 | 1306 | 2213 |
| -300...+100 | 169 | 396 | 524 | 1396 | 2352 |
| -300...+200 | 197 | 456 | 590 | 1537 | 2569 |
| -300...+300 | 229 | 494 | 679 | 1682 | 2788 |
| -300...+500 | 279 | 565 | 790 | 2004 | 3274 |
| -200...TSS  | 127 | 238 | 342 | 976  | 1684 |
| -200...+50  | 142 | 302 | 413 | 1134 | 1883 |
| -200...+100 | 167 | 337 | 469 | 1224 | 2034 |
| -200...+200 | 209 | 411 | 551 | 1412 | 2320 |
| -200...+300 | 228 | 459 | 619 | 1586 | 2562 |
| -200...+500 | 269 | 547 | 726 | 1789 | 3176 |
| -100...TSS  | 86  | 168 | 246 | 684  | 1176 |
| -100...+50  | 114 | 239 | 322 | 903  | 1586 |
| -100...+100 | 141 | 282 | 377 | 1021 | 1815 |
| -100...+200 | 170 | 352 | 472 | 1264 | 2041 |
| -100...+300 | 185 | 398 | 550 | 1377 | 2294 |
| -100...+500 | 233 | 513 | 675 | 1673 | 2791 |
| -50...TSS   | 51  | 91  | 143 | 445  | 843  |
| -50...+50   | 90  | 183 | 268 | 756  | 1267 |
| -50...+100  | 115 | 248 | 334 | 943  | 1562 |
| -50...+200  | 145 | 323 | 467 | 1146 | 1927 |
| -50...+300  | 183 | 374 | 537 | 1269 | 2166 |
| -50...+500  | 241 | 499 | 676 | 1586 | 2696 |
| TSS...+50   | 47  | 129 | 193 | 585  | 940  |
| TSS...+100  | 85  | 191 | 281 | 783  | 1328 |
| TSS...+200  | 123 | 287 | 417 | 1048 | 1749 |
| TSS...+300  | 146 | 341 | 485 | 1221 | 1992 |
| TSS...+500  | 226 | 454 | 603 | 1476 | 2511 |
| +0...TTS    | 159 | 390 | 581 | 1704 | 2944 |
| +100...TTS  | 173 | 415 | 591 | 1822 | 3042 |
| +200...TTS  | 176 | 412 | 626 | 1855 | 3130 |
| +300...TTS  | 184 | 466 | 670 | 1940 | 3186 |
| +400...TTS  | 188 | 483 | 722 | 2013 | 3266 |
| +500...TTS  | 186 | 505 | 762 | 2125 | 3401 |
| +1000...TTS | 201 | 565 | 818 | 2321 | 3741 |

**Supplementary Table S4.** Most enriched with CpG TLs categories of enhancers

| Enhancer category                      | CpG TL/BG ratio | P value    |
|----------------------------------------|-----------------|------------|
| cell                                   | 3.923           | 2.532E-114 |
| native cell                            | 3.897           | 7.417E-114 |
| eukaryotic cell                        | 3.901           | 1.128E-113 |
| animal cell                            | 3.901           | 1.128E-113 |
| somatic cell                           | 3.900           | 1.247E-112 |
| hematopoietic cell                     | 4.064           | 3.409E-107 |
| stuff accumulating cell                | 4.132           | 1.478E-102 |
| motile cell                            | 3.956           | 1.726E-100 |
| epithelial cell                        | 3.817           | 7.719E-95  |
| connective tissue cell                 | 4.042           | 1.568E-91  |
| stem cell                              | 3.927           | 6.912E-86  |
| leukocyte                              | 3.909           | 1.542E-85  |
| somatic stem cell                      | 4.151           | 9.780E-85  |
| multi fate stem cell                   | 4.156           | 4.258E-84  |
| nongranular leukocyte                  | 4.169           | 1.124E-81  |
| myeloid cell                           | 3.831           | 6.720E-80  |
| secretory cell                         | 4.466           | 2.672E-79  |
| myeloid leukocyte                      | 3.969           | 2.746E-75  |
| barrier cell                           | 4.263           | 9.351E-74  |
| lining cell                            | 4.263           | 2.437E-73  |
| mesenchymal cell                       | 4.203           | 3.383E-73  |
| electrically responsive cell           | 3.808           | 9.240E-73  |
| electrically active cell               | 3.808           | 9.240E-73  |
| monocyte                               | 4.434           | 2.806E-70  |
| meso-epithelial cell                   | 4.462           | 1.225E-69  |
| endothelial cell                       | 4.521           | 7.970E-67  |
| lymphocyte                             | 4.238           | 3.485E-65  |
| blood cell                             | 4.713           | 5.952E-65  |
| contractile cell                       | 3.985           | 5.423E-64  |
| nucleate cell                          | 3.783           | 3.616E-63  |
| phagocyte                              | 4.010           | 5.099E-62  |
| defensive cell                         | 4.010           | 5.099E-62  |
| muscle cell                            | 3.971           | 1.166E-61  |
| CD14+, CD16- classical monocyte        | 4.475           | 2.631E-61  |
| classical monocyte                     | 4.475           | 2.631E-61  |
| fibroblast                             | 3.871           | 1.393E-60  |
| smooth muscle cell                     | 4.260           | 3.254E-59  |
| T cell                                 | 4.813           | 4.617E-59  |
| embryonic cell                         | 3.672           | 2.541E-58  |
| ecto-epithelial cell                   | 3.640           | 2.461E-57  |
| columnar cuboidal epithelial cell      | 3.722           | 7.650E-57  |
| squamous epithelial cell               | 3.751           | 2.517E-56  |
| vascular associated smooth muscle cell | 4.259           | 2.663E-54  |
| neurecto-epithelial cell               | 3.655           | 3.242E-54  |
| CD14+, CD16+ monocyte                  | 4.820           | 3.511E-54  |
| endocrine cell                         | 4.459           | 1.192E-53  |
| granulocyte                            | 4.547           | 5.093E-53  |

|                                           |       |           |
|-------------------------------------------|-------|-----------|
| cardiocyte                                | 4.870 | 2.729E-52 |
| macrophage                                | 4.142 | 4.737E-52 |
| lymphocyte of B lineage                   | 4.447 | 5.886E-52 |
| basophil                                  | 4.644 | 2.376E-51 |
| endothelial cell of vascular tree         | 4.361 | 4.079E-51 |
| pigment cell                              | 3.592 | 1.605E-50 |
| neural cell                               | 3.424 | 5.124E-49 |
| single nucleate cell                      | 4.882 | 1.786E-48 |
| mononuclear cell                          | 4.882 | 1.786E-48 |
| non-terminally differentiated cell        | 3.735 | 2.339E-48 |
| neutrophil                                | 6.749 | 6.521E-48 |
| alpha-beta T cell                         | 5.305 | 1.021E-47 |
| mature T cell                             | 5.305 | 1.021E-47 |
| mature alpha-beta T cell                  | 5.305 | 1.021E-47 |
| extraembryonic cell                       | 4.299 | 4.213E-47 |
| histamine secreting cell                  | 4.487 | 6.807E-47 |
| biogenic amine secreting cell             | 4.487 | 6.807E-47 |
| mast cell                                 | 4.487 | 6.807E-47 |
| natural killer cell                       | 5.214 | 9.855E-46 |
| CD4+, alpha-beta T cell                   | 6.208 | 1.058E-45 |
| skin fibroblast                           | 4.022 | 6.369E-45 |
| melanocyte                                | 3.474 | 1.306E-44 |
| conventional dendritic cell               | 4.288 | 3.765E-44 |
| cell of skeletal muscle                   | 3.948 | 3.765E-44 |
| dendritic cell                            | 4.288 | 3.765E-44 |
| endothelial cell of lymphatic vessel      | 4.351 | 6.258E-44 |
| fat cell                                  | 4.340 | 1.010E-43 |
| neuron associated cell                    | 4.076 | 2.456E-42 |
| aortic smooth muscle cell                 | 4.187 | 7.547E-42 |
| mesenchymal stem cell of adipose          | 4.327 | 3.557E-41 |
| myoblast                                  | 4.502 | 3.557E-41 |
| muscle precursor cell                     | 4.212 | 5.407E-41 |
| cardiac mesenchymal cell                  | 4.875 | 7.126E-41 |
| glial cell (sensu Vertebrata)             | 4.153 | 8.093E-41 |
| glial cell                                | 4.153 | 8.093E-41 |
| gamma-delta T cell                        | 7.138 | 1.004E-35 |
| naive T cell                              | 6.821 | 2.246E-31 |
| CD4+, CD25+, alpha-beta regulatory T cell | 6.821 | 2.246E-31 |
| naive regulatory T cell                   | 6.821 | 2.246E-31 |
| regulatory T cell                         | 6.821 | 2.246E-31 |
| smooth muscle cell of the carotid artery  | 6.024 | 2.211E-29 |
| hair follicle cell                        | 6.329 | 4.923E-28 |
| subcutaneous fat cell                     | 6.529 | 1.533E-25 |
| fibroblast of mammary gland               | 6.968 | 2.002E-17 |
| outer root sheath cell                    | 6.405 | 2.234E-16 |

**Supplementary Table S5.** Names of the cell samples in the study



| Sample Name                                            | Number of Methylation Replicates | Number of Expression Replicates |
|--------------------------------------------------------|----------------------------------|---------------------------------|
| adipose                                                | 3                                | 3                               |
| adrenal gland                                          | 3                                | 3                               |
| bladder                                                | 3                                | 1                               |
| Brain Germinal Matrix                                  | 1                                | 1                               |
| Breast Luminal Epithelial Cells                        | 1                                | 3                               |
| Breast Myoepithelial Cells                             | 3                                | 3                               |
| CD14 primary cells                                     | 3                                | 1                               |
| CD3 primary cells                                      | 3                                | 2                               |
| CD56 primary cells                                     | 3                                | 1                               |
| esophagus                                              | 3                                | 3                               |
| gastric                                                | 3                                | 3                               |
| H1 +BMP4 cell line                                     | 3                                | 2                               |
| H1 BMP4 derived mesendoderm cultured cells             | 3                                | 2                               |
| H1 cell line                                           | 3                                | 3                               |
| H1 derived mesenchymal stem cells                      | 3                                | 2                               |
| H1 derived neuronal progenitor cultured cells          | 3                                | 3                               |
| H9 cell line                                           | 3                                | 1                               |
| heart aorta                                            | 3                                | 3                               |
| heart left ventricle                                   | 3                                | 3                               |
| heart right atrium                                     | 3                                | 3                               |
| heart right ventricle                                  | 3                                | 3                               |
| hESC-derived CD184+ endoderm cultured cells            | 3                                | 3                               |
| hESC-derived CD56+ ectoderm cultured cells             | 3                                | 3                               |
| hESC-derived CD56+ mesoderm cultured cells             | 3                                | 3                               |
| HUES64 cell line                                       | 3                                | 3                               |
| IMR90 cell line                                        | 3                                | 3                               |
| iPS DF 19.11 cell line                                 | 3                                | 2                               |
| iPS DF 6.9 cell line                                   | 3                                | 1                               |
| large intestine                                        | 3                                | 3                               |
| liver                                                  | 3                                | 2                               |
| lung                                                   | 3                                | 3                               |
| muscle leg                                             | 3                                | 3                               |
| muscle trunk                                           | 3                                | 3                               |
| Neurosphere Cultured Cells Cortex Derived              | 2                                | 4                               |
| Neurosphere Cultured Cells Ganglionic Eminence Derived | 3                                | 4                               |
| ovary                                                  | 3                                | 3                               |
| pancreas                                               | 3                                | 3                               |
| Penis Foreskin Fibroblast Primary Cells                | 1                                | 3                               |
| Penis Foreskin Keratinocyte Primary Cells              | 2                                | 3                               |
| placenta                                               | 3                                | 2                               |
| psoas muscle                                           | 3                                | 3                               |
| sigmoid colon                                          | 3                                | 3                               |
| small intestine                                        | 3                                | 3                               |
| spinal cord                                            | 3                                | 3                               |
| spleen                                                 | 3                                | 3                               |

|                                 |   |   |
|---------------------------------|---|---|
| stomach                         | 3 | 3 |
| thymus                          | 3 | 3 |
| UCSF-4 embryonic stem cell line | 2 | 2 |

**Supplementary Table S6. Enhancers = H3K27ac+H3K4me1-H3K4me3**

| Name                          | Samples ids                                 | TL num | BG num  | BG std | Fisher Pvalue |
|-------------------------------|---------------------------------------------|--------|---------|--------|---------------|
| A549                          | ENCFF697WAE,<br>ENCFF276ZZL,<br>ENCFF558FNN | 915    | 376.66  | 20.59  | 3.6E-53       |
| ascending aorta               | ENCFF020COG,<br>ENCFF838XQY,<br>ENCFF865ATS | 1544   | 749.42  | 24.28  | 3.9E-65       |
| body of pancreas              | ENCFF008FVK,<br>ENCFF946VNI,<br>ENCFF416CSY | 1980   | 574.18  | 22.72  | 1.7E-186      |
| breast epithelium             | ENCFF190SES,<br>ENCFF492VMK,<br>ENCFF779MAU | 278    | 115.84  | 10.56  | 9.0E-17       |
| esophagus muscularis mucosa   | ENCFF693CZV,<br>ENCFF637MZI,<br>ENCFF534AZK | 1628   | 900.74  | 28.01  | 7.8E-50       |
| esophagus squamous epithelium | ENCFF137CFG,<br>ENCFF672JUL,<br>ENCFF572LCU | 1157   | 756.74  | 32.14  | 1.2E-20       |
| gastrocnemius medialis        | ENCFF094AJQ,<br>ENCFF286NIM,<br>ENCFF256NUL | 2876   | 1527.04 | 36.88  | 1.4E-99       |
| gastroesophageal sphincter    | ENCFF601HAA,<br>ENCFF626UWX,<br>ENCFF060URO | 138    | 62.38   | 8.46   | 7.7E-08       |
| heart left ventricle          | ENCFF946SRJ,<br>ENCFF986INV,<br>ENCFF391EFJ | 3023   | 1174.48 | 35.20  | 4.3E-197      |
| MM.1S                         | ENCFF363EKN,<br>ENCFF538AHZ,<br>ENCFF552LNJ | 130    | 74.44   | 9.36   | 1.0E-04       |
| neutrophil                    | ENCFF775EFB,<br>ENCFF598KIH,<br>ENCFF480KEJ | 760    | 624.74  | 25.37  | 2.4E-4        |
| Peyer's patch                 | ENCFF218SQX,<br>ENCFF357CHH,<br>ENCFF603AYP | 59     | 17.02   | 4.58   | 1.4E-06       |
| right atrium auricular region | ENCFF052BXS,<br>ENCFF052PPU,<br>ENCFF593MHZ | 15     | 4.04    | 1.95   | 1.9E-2        |
| right lobe of liver           | ENCFF710URH,<br>ENCFF629FSX,<br>ENCFF636VXP | 37     | 20.2    | 4.56   | 3.3E-2        |

|                  |                                             |      |        |       |          |
|------------------|---------------------------------------------|------|--------|-------|----------|
| sigmoid colon    | ENCFF067IPT,<br>ENCFF466OIS,<br>ENCFF197CZF | 109  | 28.72  | 5.92  | 1.7E-12  |
| spleen           | ENCFF640EAT,<br>ENCFF837ZZH,<br>ENCFF590BSY | 485  | 275.78 | 16.16 | 1.7E-14  |
| stomach          | ENCFF888CZC,<br>ENCFF735KDA,<br>ENCFF612IVQ | 2783 | 1011.6 | 31.12 | 7.9E-200 |
| thoracic aorta   | ENCFF003NBP,<br>ENCFF080KQQ,<br>ENCFF582FDJ | 287  | 155.94 | 12.43 | 3.0E-10  |
| thyroid gland    | ENCFF302TBY,<br>ENCFF710BOL,<br>ENCFF767FGW | 1871 | 748.42 | 24.86 | 2.8E-114 |
| tibial nerve     | ENCFF134SOM,<br>ENCFF724DKP,<br>ENCFF860VIA | 1705 | 718.8  | 27.16 | 3.91E-95 |
| transverse colon | ENCFF151PGH,<br>ENCFF552DJF,<br>ENCFF925YZC | 188  | 68.66  | 9.31  | 3.1E-14  |

**Supplementary Table S7. Expression data source**

| Tissue                          | Samples id | URL                                                                                                                                                                                                                                                                                                                                                     |
|---------------------------------|------------|---------------------------------------------------------------------------------------------------------------------------------------------------------------------------------------------------------------------------------------------------------------------------------------------------------------------------------------------------------|
| adipose                         | SRR578647  | <a href="ftp://ftp.ncbi.nlm.nih.gov/sra/sra-instant/reads/ByRun/sra/SRR/SRR578/SRR578647">ftp://ftp.ncbi.nlm.nih.gov/sra/sra-instant/reads/ByRun/sra/SRR/SRR578/SRR578647</a>                                                                                                                                                                           |
| adipose                         | SRR1045523 | <a href="ftp://ftp.ncbi.nlm.nih.gov/sra/sra-instant/reads/ByRun/sra/SRR/SRR104/SRR1045523">ftp://ftp.ncbi.nlm.nih.gov/sra/sra-instant/reads/ByRun/sra/SRR/SRR104/SRR1045523</a>                                                                                                                                                                         |
| adipose                         | SRR1045591 | <a href="ftp://ftp.ncbi.nlm.nih.gov/sra/sra-instant/reads/ByRun/sra/SRR/SRR104/SRR1045591">ftp://ftp.ncbi.nlm.nih.gov/sra/sra-instant/reads/ByRun/sra/SRR/SRR104/SRR1045591</a>                                                                                                                                                                         |
| adrenal gland                   | SRR578643  | <a href="ftp://ftp.ncbi.nlm.nih.gov/sra/sra-instant/reads/ByRun/sra/SRR/SRR578/SRR578643">ftp://ftp.ncbi.nlm.nih.gov/sra/sra-instant/reads/ByRun/sra/SRR/SRR578/SRR578643</a>                                                                                                                                                                           |
| adrenal gland                   | SRR1045582 | <a href="ftp://ftp.ncbi.nlm.nih.gov/sra/sra-instant/reads/ByRun/sra/SRR/SRR104/SRR1045582">ftp://ftp.ncbi.nlm.nih.gov/sra/sra-instant/reads/ByRun/sra/SRR/SRR104/SRR1045582</a>                                                                                                                                                                         |
| adrenal gland                   | SRR644516  | <a href="ftp://ftp.ncbi.nlm.nih.gov/sra/sra-instant/reads/ByRun/sra/SRR/SRR644/SRR644516">ftp://ftp.ncbi.nlm.nih.gov/sra/sra-instant/reads/ByRun/sra/SRR/SRR644/SRR644516</a>                                                                                                                                                                           |
| bladder                         | SRR651662  | <a href="ftp://ftp.ncbi.nlm.nih.gov/sra/sra-instant/reads/ByRun/sra/SRR/SRR651/SRR651662">ftp://ftp.ncbi.nlm.nih.gov/sra/sra-instant/reads/ByRun/sra/SRR/SRR651/SRR651662</a>                                                                                                                                                                           |
| Brain Germinal Matrix           | GSM751275  | <a href="ftp://ftp.ncbi.nlm.nih.gov/geo/samples/GSM751nnn/GSM751275/suppl/GSM751275%5FUUCSF%20DUBC%2EBrain%5FGerminal%5FMatrix%2EmRNA%2DSeq%2EHuFGM02%2Ebed%2Egz">ftp://ftp.ncbi.nlm.nih.gov/geo/samples/GSM751nnn/GSM751275/suppl/GSM751275%5FUUCSF%20DUBC%2EBrain%5FGerminal%5FMatrix%2EmRNA%2DSeq%2EHuFGM02%2Ebed%2Egz</a>                           |
| Breast Luminal Epithelial Cells | GSM1127103 | <a href="ftp://ftp.ncbi.nlm.nih.gov/geo/samples/GSM1127nnn/GSM1127103/suppl/GSM1127103%5FUUCSF%20DUBC%2EBreast%5FLuminal%5FEpithelial%5FCells%2EmRNA%2DSeq%2ERM084%2Ebed%2Egz">ftp://ftp.ncbi.nlm.nih.gov/geo/samples/GSM1127nnn/GSM1127103/suppl/GSM1127103%5FUUCSF%20DUBC%2EBreast%5FLuminal%5FEpithelial%5FCells%2EmRNA%2DSeq%2ERM084%2Ebed%2Egz</a> |
| Breast Luminal Epithelial Cells | GSM543029  | <a href="ftp://ftp.ncbi.nlm.nih.gov/geo/samples/GSM543nnn/GSM543029/suppl/GSM543029%5FUUCSF%20DUBC%2EBreast%5FLuminal%5FEpithelial%5FCells%2EmRNA%2DSeq%2ERM035%2Ebed%2Egz">ftp://ftp.ncbi.nlm.nih.gov/geo/samples/GSM543nnn/GSM543029/suppl/GSM543029%5FUUCSF%20DUBC%2EBreast%5FLuminal%5FEpithelial%5FCells%2EmRNA%2DSeq%2ERM035%2Ebed%2Egz</a>       |

|                                         |            |                                                                                                                                                                                                                                                                                                                                                 |
|-----------------------------------------|------------|-------------------------------------------------------------------------------------------------------------------------------------------------------------------------------------------------------------------------------------------------------------------------------------------------------------------------------------------------|
| Breast Luminal Epithelial Cells         | GSM669620  | <a href="ftp://ftp.ncbi.nlm.nih.gov/geo/samples/GSM669nnn/GSM669620/suppl/GSM669620%5FUUCSF%2DUUC%2EBreast%5FLuminal%5FEpithelial%5FCells%2EmRNA%2DSeq%2ERM080%2Ebed%2Egz">ftp://ftp.ncbi.nlm.nih.gov/geo/samples/GSM669nnn/GSM669620/suppl/GSM669620%5FUUCSF%2DUUC%2EBreast%5FLuminal%5FEpithelial%5FCells%2EmRNA%2DSeq%2ERM080%2Ebed%2Egz</a> |
| Breast Myoepithelial Cells              | GSM1127093 | <a href="ftp://ftp.ncbi.nlm.nih.gov/geo/samples/GSM1127nnn/GSM1127093/suppl/GSM1127093%5FUUCSF%2DUUC%2EBreast%5FMyoepithelial%5FCells%2EmRNA%2DSeq%2ERM084%2Ebed%2Egz">ftp://ftp.ncbi.nlm.nih.gov/geo/samples/GSM1127nnn/GSM1127093/suppl/GSM1127093%5FUUCSF%2DUUC%2EBreast%5FMyoepithelial%5FCells%2EmRNA%2DSeq%2ERM084%2Ebed%2Egz</a>         |
| Breast Myoepithelial Cells              | GSM543031  | <a href="ftp://ftp.ncbi.nlm.nih.gov/geo/samples/GSM543nnn/GSM543031/suppl/GSM543031%5FUUCSF%2DUUC%2EBreast%5FMyoepithelial%5FCells%2EmRNA%2DSeq%2ERM035%2Ebed%2Egz">ftp://ftp.ncbi.nlm.nih.gov/geo/samples/GSM543nnn/GSM543031/suppl/GSM543031%5FUUCSF%2DUUC%2EBreast%5FMyoepithelial%5FCells%2EmRNA%2DSeq%2ERM035%2Ebed%2Egz</a>               |
| Breast Myoepithelial Cells              | GSM669621  | <a href="ftp://ftp.ncbi.nlm.nih.gov/geo/samples/GSM669nnn/GSM669621/suppl/GSM669621%5FUUCSF%2DUUC%2EBreast%5FMyoepithelial%5FCells%2EmRNA%2DSeq%2ERM080%2Ebed%2Egz">ftp://ftp.ncbi.nlm.nih.gov/geo/samples/GSM669nnn/GSM669621/suppl/GSM669621%5FUUCSF%2DUUC%2EBreast%5FMyoepithelial%5FCells%2EmRNA%2DSeq%2ERM080%2Ebed%2Egz</a>               |
| CD14 primary cells                      | SRR980470  | <a href="ftp://ftp.ncbi.nlm.nih.gov/sra/sra-instant/reads/ByRun/sra/SRR/SRR980/SRR980470">ftp://ftp.ncbi.nlm.nih.gov/sra/sra-instant/reads/ByRun/sra/SRR/SRR980/SRR980470</a>                                                                                                                                                                   |
| CD3 primary cells                       | SRR980468  | <a href="ftp://ftp.ncbi.nlm.nih.gov/sra/sra-instant/reads/ByRun/sra/SRR/SRR980/SRR980468">ftp://ftp.ncbi.nlm.nih.gov/sra/sra-instant/reads/ByRun/sra/SRR/SRR980/SRR980468</a>                                                                                                                                                                   |
| CD3 primary cells                       | SRR980469  | <a href="ftp://ftp.ncbi.nlm.nih.gov/sra/sra-instant/reads/ByRun/sra/SRR/SRR980/SRR980469">ftp://ftp.ncbi.nlm.nih.gov/sra/sra-instant/reads/ByRun/sra/SRR/SRR980/SRR980469</a>                                                                                                                                                                   |
| CD56 primary cells                      | SRR980472  | <a href="ftp://ftp.ncbi.nlm.nih.gov/sra/sra-instant/reads/ByRun/sra/SRR/SRR980/SRR980472">ftp://ftp.ncbi.nlm.nih.gov/sra/sra-instant/reads/ByRun/sra/SRR/SRR980/SRR980472</a>                                                                                                                                                                   |
| esophagus                               | SRR596102  | <a href="ftp://ftp.ncbi.nlm.nih.gov/sra/sra-instant/reads/ByRun/sra/SRR/SRR596/SRR596102">ftp://ftp.ncbi.nlm.nih.gov/sra/sra-instant/reads/ByRun/sra/SRR/SRR596/SRR596102</a>                                                                                                                                                                   |
| esophagus                               | SRR596103  | <a href="ftp://ftp.ncbi.nlm.nih.gov/sra/sra-instant/reads/ByRun/sra/SRR/SRR596/SRR596103">ftp://ftp.ncbi.nlm.nih.gov/sra/sra-instant/reads/ByRun/sra/SRR/SRR596/SRR596103</a>                                                                                                                                                                   |
| esophagus                               | SRR1045586 | <a href="ftp://ftp.ncbi.nlm.nih.gov/sra/sra-instant/reads/ByRun/sra/SRR/SRR104/SRR1045586">ftp://ftp.ncbi.nlm.nih.gov/sra/sra-instant/reads/ByRun/sra/SRR/SRR104/SRR1045586</a>                                                                                                                                                                 |
| gastric                                 | SRR577583  | <a href="ftp://ftp.ncbi.nlm.nih.gov/sra/sra-instant/reads/ByRun/sra/SRR/SRR577/SRR577583">ftp://ftp.ncbi.nlm.nih.gov/sra/sra-instant/reads/ByRun/sra/SRR/SRR577/SRR577583</a>                                                                                                                                                                   |
| gastric                                 | SRR1045527 | <a href="ftp://ftp.ncbi.nlm.nih.gov/sra/sra-instant/reads/ByRun/sra/SRR/SRR104/SRR1045527">ftp://ftp.ncbi.nlm.nih.gov/sra/sra-instant/reads/ByRun/sra/SRR/SRR104/SRR1045527</a>                                                                                                                                                                 |
| gastric                                 | SRR1045595 | <a href="ftp://ftp.ncbi.nlm.nih.gov/sra/sra-instant/reads/ByRun/sra/SRR/SRR104/SRR1045595">ftp://ftp.ncbi.nlm.nih.gov/sra/sra-instant/reads/ByRun/sra/SRR/SRR104/SRR1045595</a>                                                                                                                                                                 |
| H1 +BMP4 cell line                      | SRR179591  | <a href="ftp://ftp.ncbi.nlm.nih.gov/sra/sra-instant/reads/ByRun/sra/SRR/SRR179/SRR179591">ftp://ftp.ncbi.nlm.nih.gov/sra/sra-instant/reads/ByRun/sra/SRR/SRR179/SRR179591</a>                                                                                                                                                                   |
| H1 +BMP4 cell line                      | SRR179592  | <a href="ftp://ftp.ncbi.nlm.nih.gov/sra/sra-instant/reads/ByRun/sra/SRR/SRR179/SRR179592">ftp://ftp.ncbi.nlm.nih.gov/sra/sra-instant/reads/ByRun/sra/SRR/SRR179/SRR179592</a>                                                                                                                                                                   |
| H1 BMP4 derived mesoderm cultured cells | SRR488136  | <a href="ftp://ftp.ncbi.nlm.nih.gov/sra/sra-instant/reads/ByRun/sra/SRR/SRR488/SRR488136">ftp://ftp.ncbi.nlm.nih.gov/sra/sra-instant/reads/ByRun/sra/SRR/SRR488/SRR488136</a>                                                                                                                                                                   |
| H1 BMP4 derived mesoderm cultured cells | SRR488137  | <a href="ftp://ftp.ncbi.nlm.nih.gov/sra/sra-instant/reads/ByRun/sra/SRR/SRR488/SRR488137">ftp://ftp.ncbi.nlm.nih.gov/sra/sra-instant/reads/ByRun/sra/SRR/SRR488/SRR488137</a>                                                                                                                                                                   |
| H1 cell line                            | SRR020289  | <a href="ftp://ftp.ncbi.nlm.nih.gov/sra/sra-instant/reads/ByRun/sra/SRR/SRR020/SRR020289">ftp://ftp.ncbi.nlm.nih.gov/sra/sra-instant/reads/ByRun/sra/SRR/SRR020/SRR020289</a>                                                                                                                                                                   |

|                                               |            |                                                                                                                                                                                 |
|-----------------------------------------------|------------|---------------------------------------------------------------------------------------------------------------------------------------------------------------------------------|
| H1 cell line                                  | SRR031628  | <a href="https://trace.ncbi.nlm.nih.gov/Traces/sra/sra.cgi?run=SRR031628">https://trace.ncbi.nlm.nih.gov/Traces/sra/sra.cgi?run=SRR031628</a>                                   |
| H1 cell line                                  | SRR488684  | <a href="ftp://ftp.ncbi.nlm.nih.gov/sra/sra-instant/reads/ByRun/sra/SRR/SRR488/SRR488684">ftp://ftp.ncbi.nlm.nih.gov/sra/sra-instant/reads/ByRun/sra/SRR/SRR488/SRR488684</a>   |
| H1 derived mesenchymal stem cells             | SRR486239  | <a href="ftp://ftp.ncbi.nlm.nih.gov/sra/sra-instant/reads/ByRun/sra/SRR/SRR486/SRR486239">ftp://ftp.ncbi.nlm.nih.gov/sra/sra-instant/reads/ByRun/sra/SRR/SRR486/SRR486239</a>   |
| H1 derived mesenchymal stem cells             | SRR486240  | <a href="ftp://ftp.ncbi.nlm.nih.gov/sra/sra-instant/reads/ByRun/sra/SRR/SRR486/SRR486240">ftp://ftp.ncbi.nlm.nih.gov/sra/sra-instant/reads/ByRun/sra/SRR/SRR486/SRR486240</a>   |
| H1 derived neuronal progenitor cultured cells | SRR179593  | <a href="ftp://ftp.ncbi.nlm.nih.gov/sra/sra-instant/reads/ByRun/sra/SRR/SRR179/SRR179593">ftp://ftp.ncbi.nlm.nih.gov/sra/sra-instant/reads/ByRun/sra/SRR/SRR179/SRR179593</a>   |
| H1 derived neuronal progenitor cultured cells | SRR179594  | <a href="ftp://ftp.ncbi.nlm.nih.gov/sra/sra-instant/reads/ByRun/sra/SRR/SRR179/SRR179594">ftp://ftp.ncbi.nlm.nih.gov/sra/sra-instant/reads/ByRun/sra/SRR/SRR179/SRR179594</a>   |
| H1 derived neuronal progenitor cultured cells | SRR486241  | <a href="ftp://ftp.ncbi.nlm.nih.gov/sra/sra-instant/reads/ByRun/sra/SRR/SRR486/SRR486241">ftp://ftp.ncbi.nlm.nih.gov/sra/sra-instant/reads/ByRun/sra/SRR/SRR486/SRR486241</a>   |
| H9 cell line                                  | SRR304995  | <a href="ftp://ftp.ncbi.nlm.nih.gov/sra/sra-instant/reads/ByRun/sra/SRR/SRR304/SRR304995">ftp://ftp.ncbi.nlm.nih.gov/sra/sra-instant/reads/ByRun/sra/SRR/SRR304/SRR304995</a>   |
| heart aorta                                   | SRR596098  | <a href="ftp://ftp.ncbi.nlm.nih.gov/sra/sra-instant/reads/ByRun/sra/SRR/SRR596/SRR596098">ftp://ftp.ncbi.nlm.nih.gov/sra/sra-instant/reads/ByRun/sra/SRR/SRR596/SRR596098</a>   |
| heart aorta                                   | SRR596099  | <a href="ftp://ftp.ncbi.nlm.nih.gov/sra/sra-instant/reads/ByRun/sra/SRR/SRR596/SRR596099">ftp://ftp.ncbi.nlm.nih.gov/sra/sra-instant/reads/ByRun/sra/SRR/SRR596/SRR596099</a>   |
| heart aorta                                   | SRR1054856 | <a href="ftp://ftp.ncbi.nlm.nih.gov/sra/sra-instant/reads/ByRun/sra/SRR/SRR105/SRR1054856">ftp://ftp.ncbi.nlm.nih.gov/sra/sra-instant/reads/ByRun/sra/SRR/SRR105/SRR1054856</a> |
| heart left ventricle                          | SRR578627  | <a href="ftp://ftp.ncbi.nlm.nih.gov/sra/sra-instant/reads/ByRun/sra/SRR/SRR578/SRR578627">ftp://ftp.ncbi.nlm.nih.gov/sra/sra-instant/reads/ByRun/sra/SRR/SRR578/SRR578627</a>   |
| heart left ventricle                          | SRR578628  | <a href="ftp://ftp.ncbi.nlm.nih.gov/sra/sra-instant/reads/ByRun/sra/SRR/SRR578/SRR578628">ftp://ftp.ncbi.nlm.nih.gov/sra/sra-instant/reads/ByRun/sra/SRR/SRR578/SRR578628</a>   |
| heart left ventricle                          | SRR577587  | <a href="ftp://ftp.ncbi.nlm.nih.gov/sra/sra-instant/reads/ByRun/sra/SRR/SRR577/SRR577587">ftp://ftp.ncbi.nlm.nih.gov/sra/sra-instant/reads/ByRun/sra/SRR/SRR577/SRR577587</a>   |
| heart right atrium                            | SRR578651  | <a href="ftp://ftp.ncbi.nlm.nih.gov/sra/sra-instant/reads/ByRun/sra/SRR/SRR578/SRR578651">ftp://ftp.ncbi.nlm.nih.gov/sra/sra-instant/reads/ByRun/sra/SRR/SRR578/SRR578651</a>   |
| heart right atrium                            | SRR578652  | <a href="ftp://ftp.ncbi.nlm.nih.gov/sra/sra-instant/reads/ByRun/sra/SRR/SRR578/SRR578652">ftp://ftp.ncbi.nlm.nih.gov/sra/sra-instant/reads/ByRun/sra/SRR/SRR578/SRR578652</a>   |
| heart right atrium                            | SRR578653  | <a href="ftp://ftp.ncbi.nlm.nih.gov/sra/sra-instant/reads/ByRun/sra/SRR/SRR578/SRR578653">ftp://ftp.ncbi.nlm.nih.gov/sra/sra-instant/reads/ByRun/sra/SRR/SRR578/SRR578653</a>   |
| heart right ventricle                         | SRR577591  | <a href="ftp://ftp.ncbi.nlm.nih.gov/sra/sra-instant/reads/ByRun/sra/SRR/SRR577/SRR577591">ftp://ftp.ncbi.nlm.nih.gov/sra/sra-instant/reads/ByRun/sra/SRR/SRR577/SRR577591</a>   |
| heart right ventricle                         | SRR577592  | <a href="ftp://ftp.ncbi.nlm.nih.gov/sra/sra-instant/reads/ByRun/sra/SRR/SRR577/SRR577592">ftp://ftp.ncbi.nlm.nih.gov/sra/sra-instant/reads/ByRun/sra/SRR/SRR577/SRR577592</a>   |
| heart right ventricle                         | SRR1045574 | <a href="ftp://ftp.ncbi.nlm.nih.gov/sra/sra-instant/reads/ByRun/sra/SRR/SRR104/SRR1045574">ftp://ftp.ncbi.nlm.nih.gov/sra/sra-instant/reads/ByRun/sra/SRR/SRR104/SRR1045574</a> |
| hESC-derived CD184+ endoderm cultured cells   | SRR1067051 | <a href="ftp://ftp.ncbi.nlm.nih.gov/sra/sra-instant/reads/ByRun/sra/SRR/SRR106/SRR1067051">ftp://ftp.ncbi.nlm.nih.gov/sra/sra-instant/reads/ByRun/sra/SRR/SRR106/SRR1067051</a> |

|                                             |            |                                                                                                                                                                                 |
|---------------------------------------------|------------|---------------------------------------------------------------------------------------------------------------------------------------------------------------------------------|
| hESC-derived CD184+ endoderm cultured cells | SRR1067055 | <a href="ftp://ftp.ncbi.nlm.nih.gov/sra/sra-instant/reads/ByRun/sra/SRR/SRR106/SRR1067055">ftp://ftp.ncbi.nlm.nih.gov/sra/sra-instant/reads/ByRun/sra/SRR/SRR106/SRR1067055</a> |
| hESC-derived CD184+ endoderm cultured cells | SRR1067049 | <a href="ftp://ftp.ncbi.nlm.nih.gov/sra/sra-instant/reads/ByRun/sra/SRR/SRR106/SRR1067049">ftp://ftp.ncbi.nlm.nih.gov/sra/sra-instant/reads/ByRun/sra/SRR/SRR106/SRR1067049</a> |
| hESC-derived CD56+ ectoderm cultured cells  | SRR1097443 | <a href="ftp://ftp.ncbi.nlm.nih.gov/sra/sra-instant/reads/ByRun/sra/SRR/SRR109/SRR1097443">ftp://ftp.ncbi.nlm.nih.gov/sra/sra-instant/reads/ByRun/sra/SRR/SRR109/SRR1097443</a> |
| hESC-derived CD56+ ectoderm cultured cells  | SRR1097446 | <a href="ftp://ftp.ncbi.nlm.nih.gov/sra/sra-instant/reads/ByRun/sra/SRR/SRR109/SRR1097446">ftp://ftp.ncbi.nlm.nih.gov/sra/sra-instant/reads/ByRun/sra/SRR/SRR109/SRR1097446</a> |
| hESC-derived CD56+ ectoderm cultured cells  | SRR1097444 | <a href="ftp://ftp.ncbi.nlm.nih.gov/sra/sra-instant/reads/ByRun/sra/SRR/SRR109/SRR1097444">ftp://ftp.ncbi.nlm.nih.gov/sra/sra-instant/reads/ByRun/sra/SRR/SRR109/SRR1097444</a> |
| hESC-derived CD56+ mesoderm cultured cells  | SRR1067489 | <a href="ftp://ftp.ncbi.nlm.nih.gov/sra/sra-instant/reads/ByRun/sra/SRR/SRR106/SRR1067489">ftp://ftp.ncbi.nlm.nih.gov/sra/sra-instant/reads/ByRun/sra/SRR/SRR106/SRR1067489</a> |
| hESC-derived CD56+ mesoderm cultured cells  | SRR1067490 | <a href="ftp://ftp.ncbi.nlm.nih.gov/sra/sra-instant/reads/ByRun/sra/SRR/SRR106/SRR1067490">ftp://ftp.ncbi.nlm.nih.gov/sra/sra-instant/reads/ByRun/sra/SRR/SRR106/SRR1067490</a> |
| hESC-derived CD56+ mesoderm cultured cells  | SRR1067491 | <a href="ftp://ftp.ncbi.nlm.nih.gov/sra/sra-instant/reads/ByRun/sra/SRR/SRR106/SRR1067491">ftp://ftp.ncbi.nlm.nih.gov/sra/sra-instant/reads/ByRun/sra/SRR/SRR106/SRR1067491</a> |
| HUES64 cell line                            | SRR1107846 | <a href="ftp://ftp.ncbi.nlm.nih.gov/sra/sra-instant/reads/ByRun/sra/SRR/SRR110/SRR1107846">ftp://ftp.ncbi.nlm.nih.gov/sra/sra-instant/reads/ByRun/sra/SRR/SRR110/SRR1107846</a> |
| HUES64 cell line                            | SRR1107848 | <a href="ftp://ftp.ncbi.nlm.nih.gov/sra/sra-instant/reads/ByRun/sra/SRR/SRR110/SRR1107848">ftp://ftp.ncbi.nlm.nih.gov/sra/sra-instant/reads/ByRun/sra/SRR/SRR110/SRR1107848</a> |
| HUES64 cell line                            | SRR1067487 | <a href="ftp://ftp.ncbi.nlm.nih.gov/sra/sra-instant/reads/ByRun/sra/SRR/SRR106/SRR1067487">ftp://ftp.ncbi.nlm.nih.gov/sra/sra-instant/reads/ByRun/sra/SRR/SRR106/SRR1067487</a> |
| IMR90 cell line                             | SRR020295  | <a href="ftp://ftp.ncbi.nlm.nih.gov/sra/sra-instant/reads/ByRun/sra/SRR/SRR020/SRR020295">ftp://ftp.ncbi.nlm.nih.gov/sra/sra-instant/reads/ByRun/sra/SRR/SRR020/SRR020295</a>   |
| IMR90 cell line                             | SRR020293  | <a href="ftp://ftp.ncbi.nlm.nih.gov/sra/sra-instant/reads/ByRun/sra/SRR/SRR020/SRR020293">ftp://ftp.ncbi.nlm.nih.gov/sra/sra-instant/reads/ByRun/sra/SRR/SRR020/SRR020293</a>   |
| IMR90 cell line                             | SRR020294  | <a href="ftp://ftp.ncbi.nlm.nih.gov/sra/sra-instant/reads/ByRun/sra/SRR/SRR020/SRR020294">ftp://ftp.ncbi.nlm.nih.gov/sra/sra-instant/reads/ByRun/sra/SRR/SRR020/SRR020294</a>   |
| iPS DF 19.11 cell line                      | SRR179588  | <a href="ftp://ftp.ncbi.nlm.nih.gov/sra/sra-instant/reads/ByRun/sra/SRR/SRR179/SRR179588">ftp://ftp.ncbi.nlm.nih.gov/sra/sra-instant/reads/ByRun/sra/SRR/SRR179/SRR179588</a>   |
| iPS DF 19.11 cell line                      | SRR179589  | <a href="ftp://ftp.ncbi.nlm.nih.gov/sra/sra-instant/reads/ByRun/sra/SRR/SRR179/SRR179589">ftp://ftp.ncbi.nlm.nih.gov/sra/sra-instant/reads/ByRun/sra/SRR/SRR179/SRR179589</a>   |
| iPS DF 6.9 cell line                        | SRR179590  | <a href="ftp://ftp.ncbi.nlm.nih.gov/sra/sra-instant/reads/ByRun/sra/SRR/SRR179/SRR179590">ftp://ftp.ncbi.nlm.nih.gov/sra/sra-instant/reads/ByRun/sra/SRR/SRR179/SRR179590</a>   |

|                                           |            |                                                                                                                                                                                                                                                                                                                                                                               |
|-------------------------------------------|------------|-------------------------------------------------------------------------------------------------------------------------------------------------------------------------------------------------------------------------------------------------------------------------------------------------------------------------------------------------------------------------------|
| large intestine                           | SRR643761  | <a href="ftp://ftp.ncbi.nlm.nih.gov/sra/sra-instant/reads/ByRun/sra/SRR/SRR643/SRR643761">ftp://ftp.ncbi.nlm.nih.gov/sra/sra-instant/reads/ByRun/sra/SRR/SRR643/SRR643761</a>                                                                                                                                                                                                 |
| large intestine                           | SRR643741  | <a href="ftp://ftp.ncbi.nlm.nih.gov/sra/sra-instant/reads/ByRun/sra/SRR/SRR643/SRR643741">ftp://ftp.ncbi.nlm.nih.gov/sra/sra-instant/reads/ByRun/sra/SRR/SRR643/SRR643741</a>                                                                                                                                                                                                 |
| large intestine                           | SRR643755  | <a href="ftp://ftp.ncbi.nlm.nih.gov/sra/sra-instant/reads/ByRun/sra/SRR/SRR643/SRR643755">ftp://ftp.ncbi.nlm.nih.gov/sra/sra-instant/reads/ByRun/sra/SRR/SRR643/SRR643755</a>                                                                                                                                                                                                 |
| liver                                     | SRR651663  | <a href="ftp://ftp.ncbi.nlm.nih.gov/sra/sra-instant/reads/ByRun/sra/SRR/SRR651/SRR651663">ftp://ftp.ncbi.nlm.nih.gov/sra/sra-instant/reads/ByRun/sra/SRR/SRR651/SRR651663</a>                                                                                                                                                                                                 |
| liver                                     | SRR651664  | <a href="ftp://ftp.ncbi.nlm.nih.gov/sra/sra-instant/reads/ByRun/sra/SRR/SRR651/SRR651664">ftp://ftp.ncbi.nlm.nih.gov/sra/sra-instant/reads/ByRun/sra/SRR/SRR651/SRR651664</a>                                                                                                                                                                                                 |
| lung                                      | SRR577579  | <a href="ftp://ftp.ncbi.nlm.nih.gov/sra/sra-instant/reads/ByRun/sra/SRR/SRR577/SRR577579">ftp://ftp.ncbi.nlm.nih.gov/sra/sra-instant/reads/ByRun/sra/SRR/SRR577/SRR577579</a>                                                                                                                                                                                                 |
| lung                                      | SRR577580  | <a href="ftp://ftp.ncbi.nlm.nih.gov/sra/sra-instant/reads/ByRun/sra/SRR/SRR577/SRR577580">ftp://ftp.ncbi.nlm.nih.gov/sra/sra-instant/reads/ByRun/sra/SRR/SRR577/SRR577580</a>                                                                                                                                                                                                 |
| lung                                      | SRR1045530 | <a href="ftp://ftp.ncbi.nlm.nih.gov/sra/sra-instant/reads/ByRun/sra/SRR/SRR104/SRR1045530">ftp://ftp.ncbi.nlm.nih.gov/sra/sra-instant/reads/ByRun/sra/SRR/SRR104/SRR1045530</a>                                                                                                                                                                                               |
| muscle leg                                | SRR786797  | <a href="ftp://ftp.ncbi.nlm.nih.gov/sra/sra-instant/reads/ByRun/sra/SRR/SRR786/SRR786797">ftp://ftp.ncbi.nlm.nih.gov/sra/sra-instant/reads/ByRun/sra/SRR/SRR786/SRR786797</a>                                                                                                                                                                                                 |
| muscle leg                                | SRR786777  | <a href="ftp://ftp.ncbi.nlm.nih.gov/sra/sra-instant/reads/ByRun/sra/SRR/SRR786/SRR786777">ftp://ftp.ncbi.nlm.nih.gov/sra/sra-instant/reads/ByRun/sra/SRR/SRR786/SRR786777</a>                                                                                                                                                                                                 |
| muscle leg                                | SRR980475  | <a href="ftp://ftp.ncbi.nlm.nih.gov/sra/sra-instant/reads/ByRun/sra/SRR/SRR980/SRR980475">ftp://ftp.ncbi.nlm.nih.gov/sra/sra-instant/reads/ByRun/sra/SRR/SRR980/SRR980475</a>                                                                                                                                                                                                 |
| muscle trunk                              | SRR980485  | <a href="ftp://ftp.ncbi.nlm.nih.gov/sra/sra-instant/reads/ByRun/sra/SRR/SRR980/SRR980485">ftp://ftp.ncbi.nlm.nih.gov/sra/sra-instant/reads/ByRun/sra/SRR/SRR980/SRR980485</a>                                                                                                                                                                                                 |
| muscle trunk                              | SRR980486  | <a href="ftp://ftp.ncbi.nlm.nih.gov/sra/sra-instant/reads/ByRun/sra/SRR/SRR980/SRR980486">ftp://ftp.ncbi.nlm.nih.gov/sra/sra-instant/reads/ByRun/sra/SRR/SRR980/SRR980486</a>                                                                                                                                                                                                 |
| muscle trunk                              | SRR786757  | <a href="ftp://ftp.ncbi.nlm.nih.gov/sra/sra-instant/reads/ByRun/sra/SRR/SRR786/SRR786757">ftp://ftp.ncbi.nlm.nih.gov/sra/sra-instant/reads/ByRun/sra/SRR/SRR786/SRR786757</a>                                                                                                                                                                                                 |
| Neurosphere Cultured Cells Cortex Derived | GSM751270  | <a href="ftp://ftp.ncbi.nlm.nih.gov/geo/samples/GSM751nnn/GSM751270/suppl/GSM751270%5FUUCSF%2DUBC%2ENeurosphere%5FCultured%5FCells%5FCortex%5FDerived%2EmRNA%2DSeq%2EHuFNESC01%2Ebed%2Eg">ftp://ftp.ncbi.nlm.nih.gov/geo/samples/GSM751nnn/GSM751270/suppl/GSM751270%5FUUCSF%2DUBC%2ENeurosphere%5FCultured%5FCells%5FCortex%5FDerived%2EmRNA%2DSeq%2EHuFNESC01%2Ebed%2Eg</a> |
| Neurosphere Cultured Cells Cortex Derived | GSM751272  | <a href="ftp://ftp.ncbi.nlm.nih.gov/geo/samples/GSM751nnn/GSM751272/suppl/GSM751272%5FUUCSF%2DUBC%2ENeurosphere%5FCultured%5FCells%5FCortex%5FDerived%2EmRNA%2DSeq%2EHuFNESC02%2Ebed%2Eg">ftp://ftp.ncbi.nlm.nih.gov/geo/samples/GSM751nnn/GSM751272/suppl/GSM751272%5FUUCSF%2DUBC%2ENeurosphere%5FCultured%5FCells%5FCortex%5FDerived%2EmRNA%2DSeq%2EHuFNESC02%2Ebed%2Eg</a> |
| Neurosphere Cultured Cells Cortex Derived | GSM751279  | <a href="ftp://ftp.ncbi.nlm.nih.gov/geo/samples/GSM751nnn/GSM751279/suppl/GSM751279%5FUUCSF%2DUBC%2ENeurosphere%5FCultured%5FCells%5FCortex%5FDerived%2EmRNA%2DSeq%2EHuFNESC03%2Ebed%2Eg">ftp://ftp.ncbi.nlm.nih.gov/geo/samples/GSM751nnn/GSM751279/suppl/GSM751279%5FUUCSF%2DUBC%2ENeurosphere%5FCultured%5FCells%5FCortex%5FDerived%2EmRNA%2DSeq%2EHuFNESC03%2Ebed%2Eg</a> |
| Neurosphere Cultured Cells Cortex Derived | GSM958176  | <a href="ftp://ftp.ncbi.nlm.nih.gov/geo/samples/GSM958nnn/GSM958176/suppl/GSM958176%5FUUCSF%2DUBC%2ENeurosphere%5FCultured%5FCells%5FCortex%5FDerived%2EmRNA%2DSeq%2EHuFNESC04%2Ebed%2Eg">ftp://ftp.ncbi.nlm.nih.gov/geo/samples/GSM958nnn/GSM958176/suppl/GSM958176%5FUUCSF%2DUBC%2ENeurosphere%5FCultured%5FCells%5FCortex%5FDerived%2EmRNA%2DSeq%2EHuFNESC04%2Ebed%2Eg</a> |

|                                                        |            |                                                                                                                                                                                                                                                                                                                                                                                                             |
|--------------------------------------------------------|------------|-------------------------------------------------------------------------------------------------------------------------------------------------------------------------------------------------------------------------------------------------------------------------------------------------------------------------------------------------------------------------------------------------------------|
| Neurosphere Cultured Cells Ganglionic Eminence Derived | GSM751271  | <a href="ftp://ftp.ncbi.nlm.nih.gov/geo/samples/GSM751nnn/GSM751271/suppl/GSM751271%5FUUCSF%2DUBC%2ENeurosphere%5FCultured%5FCells%5FGanglionic%5FEminence%5FDerived%2EmRNA%2DSeq%2EHuFNCS01%2Ebed%2Egz">ftp://ftp.ncbi.nlm.nih.gov/geo/samples/GSM751nnn/GSM751271/suppl/GSM751271%5FUUCSF%2DUBC%2ENeurosphere%5FCultured%5FCells%5FGanglionic%5FEminence%5FDerived%2EmRNA%2DSeq%2EHuFNCS01%2Ebed%2Egz</a> |
| Neurosphere Cultured Cells Ganglionic Eminence Derived | GSM751273  | <a href="ftp://ftp.ncbi.nlm.nih.gov/geo/samples/GSM751nnn/GSM751273/suppl/GSM751273%5FUUCSF%2DUBC%2ENeurosphere%5FCultured%5FCells%5FGanglionic%5FEminence%5FDerived%2EmRNA%2DSeq%2EHuFNCS02%2Ebed%2Egz">ftp://ftp.ncbi.nlm.nih.gov/geo/samples/GSM751nnn/GSM751273/suppl/GSM751273%5FUUCSF%2DUBC%2ENeurosphere%5FCultured%5FCells%5FGanglionic%5FEminence%5FDerived%2EmRNA%2DSeq%2EHuFNCS02%2Ebed%2Egz</a> |
| Neurosphere Cultured Cells Ganglionic Eminence Derived | GSM958172  | <a href="ftp://ftp.ncbi.nlm.nih.gov/geo/samples/GSM958nnn/GSM958172/suppl/GSM958172%5FUUCSF%2DUBC%2ENeurosphere%5FCultured%5FCells%5FGanglionic%5FEminence%5FDerived%2EmRNA%2DSeq%2EHuFNCS04%2Ebed%2Egz">ftp://ftp.ncbi.nlm.nih.gov/geo/samples/GSM958nnn/GSM958172/suppl/GSM958172%5FUUCSF%2DUBC%2ENeurosphere%5FCultured%5FCells%5FGanglionic%5FEminence%5FDerived%2EmRNA%2DSeq%2EHuFNCS04%2Ebed%2Egz</a> |
| Neurosphere Cultured Cells Ganglionic Eminence Derived | GSM958173  | <a href="ftp://ftp.ncbi.nlm.nih.gov/geo/samples/GSM958nnn/GSM958173/suppl/GSM958173%5FUUCSF%2DUBC%2ENeurosphere%5FCultured%5FCells%5FGanglionic%5FEminence%5FDerived%2EmRNA%2DSeq%2EHuFNCS03%2Ebed%2Egz">ftp://ftp.ncbi.nlm.nih.gov/geo/samples/GSM958nnn/GSM958173/suppl/GSM958173%5FUUCSF%2DUBC%2ENeurosphere%5FCultured%5FCells%5FGanglionic%5FEminence%5FDerived%2EmRNA%2DSeq%2EHuFNCS03%2Ebed%2Egz</a> |
| ovary                                                  | SRR578639  | <a href="ftp://ftp.ncbi.nlm.nih.gov/sra/sra-instant/reads/ByRun/sra/SRR/SRR578/SRR578639">ftp://ftp.ncbi.nlm.nih.gov/sra/sra-instant/reads/ByRun/sra/SRR/SRR578/SRR578639</a>                                                                                                                                                                                                                               |
| ovary                                                  | SRR578640  | <a href="ftp://ftp.ncbi.nlm.nih.gov/sra/sra-instant/reads/ByRun/sra/SRR/SRR578/SRR578640">ftp://ftp.ncbi.nlm.nih.gov/sra/sra-instant/reads/ByRun/sra/SRR/SRR578/SRR578640</a>                                                                                                                                                                                                                               |
| ovary                                                  | SRR786786  | <a href="ftp://ftp.ncbi.nlm.nih.gov/sra/sra-instant/reads/ByRun/sra/SRR/SRR786/SRR786786">ftp://ftp.ncbi.nlm.nih.gov/sra/sra-instant/reads/ByRun/sra/SRR/SRR786/SRR786786</a>                                                                                                                                                                                                                               |
| pancreas                                               | SRR596106  | <a href="ftp://ftp.ncbi.nlm.nih.gov/sra/sra-instant/reads/ByRun/sra/SRR/SRR596/SRR596106">ftp://ftp.ncbi.nlm.nih.gov/sra/sra-instant/reads/ByRun/sra/SRR/SRR596/SRR596106</a>                                                                                                                                                                                                                               |
| pancreas                                               | SRR596107  | <a href="ftp://ftp.ncbi.nlm.nih.gov/sra/sra-instant/reads/ByRun/sra/SRR/SRR596/SRR596107">ftp://ftp.ncbi.nlm.nih.gov/sra/sra-instant/reads/ByRun/sra/SRR/SRR596/SRR596107</a>                                                                                                                                                                                                                               |
| pancreas                                               | SRR1045598 | <a href="ftp://ftp.ncbi.nlm.nih.gov/sra/sra-instant/reads/ByRun/sra/SRR/SRR104/SRR1045598">ftp://ftp.ncbi.nlm.nih.gov/sra/sra-instant/reads/ByRun/sra/SRR/SRR104/SRR1045598</a>                                                                                                                                                                                                                             |
| Penis Foreskin Fibroblast Primary Cells                | GSM751277  | <a href="ftp://ftp.ncbi.nlm.nih.gov/geo/samples/GSM751nnn/GSM751277/suppl/GSM751277%5FUUCSF%2DUBC%2EPenis%5FForeskin%5FFibroblast%5FPrimary%5FCells%2EmRNA%2DSeq%2Eskin01%2Ebed%2Egz">ftp://ftp.ncbi.nlm.nih.gov/geo/samples/GSM751nnn/GSM751277/suppl/GSM751277%5FUUCSF%2DUBC%2EPenis%5FForeskin%5FFibroblast%5FPrimary%5FCells%2EmRNA%2DSeq%2Eskin01%2Ebed%2Egz</a>                                       |
| Penis Foreskin Fibroblast Primary Cells                | GSM941744  | <a href="ftp://ftp.ncbi.nlm.nih.gov/geo/samples/GSM941nnn/GSM941744/suppl/GSM941744%5FUUCSF%2DUBC%2EPenis%5FForeskin%5FFibroblast%5FPrimary%5FCells%2EmRNA%2DSeq%2Eskin02%2Ebed%2Egz">ftp://ftp.ncbi.nlm.nih.gov/geo/samples/GSM941nnn/GSM941744/suppl/GSM941744%5FUUCSF%2DUBC%2EPenis%5FForeskin%5FFibroblast%5FPrimary%5FCells%2EmRNA%2DSeq%2Eskin02%2Ebed%2Egz</a>                                       |
| Penis Foreskin Fibroblast Primary Cells                | GSM958178  | <a href="ftp://ftp.ncbi.nlm.nih.gov/geo/samples/GSM958nnn/GSM958178/suppl/GSM958178%5FUUCSF%2DUBC%2EPenis%5FForeskin%5FFibroblast%5FPrimary%5FCells%2EmRNA%2DSeq%2Eskin03%2Ebed%2Egz">ftp://ftp.ncbi.nlm.nih.gov/geo/samples/GSM958nnn/GSM958178/suppl/GSM958178%5FUUCSF%2DUBC%2EPenis%5FForeskin%5FFibroblast%5FPrimary%5FCells%2EmRNA%2DSeq%2Eskin03%2Ebed%2Egz</a>                                       |



|                                                 |            |                                                                                                                                                                                               |
|-------------------------------------------------|------------|-----------------------------------------------------------------------------------------------------------------------------------------------------------------------------------------------|
| Penis Foreskin<br>Keratinocyte<br>Primary Cells | GSM958177  | ftp:<br>//ftp.ncbi.nlm.nih.gov/geo/samples/GSM958nnn/<br>GSM958177/suppl/GSM958177%5FUUCSF%2DUBC%<br>2EPenis%5FForeskin%5FKeratinocyte%5FPrimary%<br>5FCells%2EmRNA%2DSeq%2Eskin03%2Ebed%2Egz |
| Penis Foreskin<br>Keratinocyte<br>Primary Cells | GSM751278  | ftp:<br>//ftp.ncbi.nlm.nih.gov/geo/samples/GSM751nnn/<br>GSM751278/suppl/GSM751278%5FUUCSF%2DUBC%<br>2EPenis%5FForeskin%5FKeratinocyte%5FPrimary%<br>5FCells%2EmRNA%2DSeq%2Eskin01%2Ebed%2Egz |
| Penis Foreskin<br>Keratinocyte<br>Primary Cells | GSM941745  | ftp:<br>//ftp.ncbi.nlm.nih.gov/geo/samples/GSM941nnn/<br>GSM941745/suppl/GSM941745%5FUUCSF%2DUBC%<br>2EPenis%5FForeskin%5FKeratinocyte%5FPrimary%<br>5FCells%2EmRNA%2DSeq%2Eskin02%2Ebed%2Egz |
| placenta                                        | SRR980480  | ftp://ftp.ncbi.nlm.nih.gov/sra/sra-instant/<br>reads/ByRun/sra/SRR/SRR980/SRR980480                                                                                                           |
| placenta                                        | SRR980481  | ftp://ftp.ncbi.nlm.nih.gov/sra/sra-instant/<br>reads/ByRun/sra/SRR/SRR980/SRR980481                                                                                                           |
| psoas muscle                                    | SRR651699  | ftp://ftp.ncbi.nlm.nih.gov/sra/sra-instant/<br>reads/ByRun/sra/SRR/SRR651/SRR651699                                                                                                           |
| psoas muscle                                    | SRR1045571 | ftp://ftp.ncbi.nlm.nih.gov/sra/sra-instant/<br>reads/ByRun/sra/SRR/SRR104/SRR1045571                                                                                                          |
| psoas muscle                                    | SRR1045603 | ftp://ftp.ncbi.nlm.nih.gov/sra/sra-instant/<br>reads/ByRun/sra/SRR/SRR104/SRR1045603                                                                                                          |
| sigmoid colon                                   | SRR578635  | ftp://ftp.ncbi.nlm.nih.gov/sra/sra-instant/<br>reads/ByRun/sra/SRR/SRR578/SRR578635                                                                                                           |
| sigmoid colon                                   | SRR577595  | ftp://ftp.ncbi.nlm.nih.gov/sra/sra-instant/<br>reads/ByRun/sra/SRR/SRR577/SRR577595                                                                                                           |
| sigmoid colon                                   | SRR1045610 | ftp://ftp.ncbi.nlm.nih.gov/sra/sra-instant/<br>reads/ByRun/sra/SRR/SRR104/SRR1045610                                                                                                          |
| small intestine                                 | SRR578631  | ftp://ftp.ncbi.nlm.nih.gov/sra/sra-instant/<br>reads/ByRun/sra/SRR/SRR578/SRR578631                                                                                                           |
| small intestine                                 | SRR1045607 | ftp://ftp.ncbi.nlm.nih.gov/sra/sra-instant/<br>reads/ByRun/sra/SRR/SRR104/SRR1045607                                                                                                          |
| small intestine                                 | SRR1045619 | ftp://ftp.ncbi.nlm.nih.gov/sra/sra-instant/<br>reads/ByRun/sra/SRR/SRR104/SRR1045619                                                                                                          |
| spinal cord                                     | SRR786783  | ftp://ftp.ncbi.nlm.nih.gov/sra/sra-instant/<br>reads/ByRun/sra/SRR/SRR786/SRR786783                                                                                                           |
| spinal cord                                     | SRR980477  | ftp://ftp.ncbi.nlm.nih.gov/sra/sra-instant/<br>reads/ByRun/sra/SRR/SRR980/SRR980477                                                                                                           |
| spinal cord                                     | SRR786804  | ftp://ftp.ncbi.nlm.nih.gov/sra/sra-instant/<br>reads/ByRun/sra/SRR/SRR786/SRR786804                                                                                                           |
| spleen                                          | SRR577599  | ftp://ftp.ncbi.nlm.nih.gov/sra/sra-instant/<br>reads/ByRun/sra/SRR/SRR577/SRR577599                                                                                                           |
| spleen                                          | SRR1045579 | ftp://ftp.ncbi.nlm.nih.gov/sra/sra-instant/<br>reads/ByRun/sra/SRR/SRR104/SRR1045579                                                                                                          |
| spleen                                          | SRR1045615 | ftp://ftp.ncbi.nlm.nih.gov/sra/sra-instant/<br>reads/ByRun/sra/SRR/SRR104/SRR1045615                                                                                                          |
| stomach                                         | SRR980462  | ftp://ftp.ncbi.nlm.nih.gov/sra/sra-instant/<br>reads/ByRun/sra/SRR/SRR980/SRR980462                                                                                                           |

|                                 |           |                                                                                                                                          |
|---------------------------------|-----------|------------------------------------------------------------------------------------------------------------------------------------------|
| stomach                         | SRR980459 | ftp://ftp.ncbi.nlm.nih.gov/sra/sra-instant/reads/ByRun/sra/SRR/SRR980/SRR980459                                                          |
| stomach                         | SRR980451 | ftp://ftp.ncbi.nlm.nih.gov/sra/sra-instant/reads/ByRun/sra/SRR/SRR980/SRR980451                                                          |
| thymus                          | SRR651673 | ftp://ftp.ncbi.nlm.nih.gov/sra/sra-instant/reads/ByRun/sra/SRR/SRR651/SRR651673                                                          |
| thymus                          | SRR980452 | ftp://ftp.ncbi.nlm.nih.gov/sra/sra-instant/reads/ByRun/sra/SRR/SRR980/SRR980452                                                          |
| thymus                          | SRR980473 | ftp://ftp.ncbi.nlm.nih.gov/sra/sra-instant/reads/ByRun/sra/SRR/SRR980/SRR980473                                                          |
| UCSF-4 embryonic stem cell line | GSM958175 | ftp://ftp.ncbi.nlm.nih.gov/geo/samples/GSM958nnn/GSM958175/suppl/GSM958175%5FUUCSF%2DUBC%2EUCSF%2D4star%2EmRNA%2DSeq%2EA11832%2Ebed%2Egz |
| UCSF-4 embryonic stem cell line | GSM958179 | ftp://ftp.ncbi.nlm.nih.gov/geo/samples/GSM958nnn/GSM958179/suppl/GSM958179%5FUUCSF%2DUBC%2EUCSF%2D4star%2EmRNA%2DSeq%2EA11831%2Ebed%2Egz |

**Supplementary Table S8. Methylation data source**

| Tissue                          | Samples id | URL                                                                                                                                                                      |
|---------------------------------|------------|--------------------------------------------------------------------------------------------------------------------------------------------------------------------------|
| adipose                         | SRR577617  | ftp://ftp.ncbi.nlm.nih.gov/sra/sra-instant/reads/ByRun/sra/SRR/SRR577/SRR577617                                                                                          |
| adipose                         | SRR1045747 | ftp://ftp.ncbi.nlm.nih.gov/sra/sra-instant/reads/ByRun/sra/SRR/SRR104/SRR1045747                                                                                         |
| adipose                         | SRR1045745 | ftp://ftp.ncbi.nlm.nih.gov/sra/sra-instant/reads/ByRun/sra/SRR/SRR104/SRR1045745                                                                                         |
| adrenal gland                   | SRR577613  | ftp://ftp.ncbi.nlm.nih.gov/sra/sra-instant/reads/ByRun/sra/SRR/SRR577/SRR577613                                                                                          |
| adrenal gland                   | SRR1045733 | ftp://ftp.ncbi.nlm.nih.gov/sra/sra-instant/reads/ByRun/sra/SRR/SRR104/SRR1045733                                                                                         |
| adrenal gland                   | SRR1045734 | ftp://ftp.ncbi.nlm.nih.gov/sra/sra-instant/reads/ByRun/sra/SRR/SRR104/SRR1045734                                                                                         |
| bladder                         | SRR641595  | ftp://ftp.ncbi.nlm.nih.gov/sra/sra-instant/reads/ByRun/sra/SRR/SRR641/SRR641595                                                                                          |
| bladder                         | SRR641596  | ftp://ftp.ncbi.nlm.nih.gov/sra/sra-instant/reads/ByRun/sra/SRR/SRR641/SRR641596                                                                                          |
| bladder                         | SRR1045744 | ftp://ftp.ncbi.nlm.nih.gov/sra/sra-instant/reads/ByRun/sra/SRR/SRR104/SRR1045744                                                                                         |
| Brain Germinal Matrix           | GSM941747  | ftp://ftp.ncbi.nlm.nih.gov/geo/samples/GSM941nnn/GSM941747/suppl/GSM941747%5FUUCSF%2DUBC%2EBrain%5FGerminal%5FMatrix%2EBisulfite%2DSeq%2EHuFGM02%2Ewig%2Egz              |
| Breast Luminal Epithelial Cells | GSM1127125 | ftp://ftp.ncbi.nlm.nih.gov/geo/samples/GSM1127nnn/GSM1127125/suppl/GSM1127125%5FUUCSF%2DUBC%2EBreast%5FLuminal%5FEpithelial%5FCells%2EBisulfite%2DSeq%2ERM066%2Ewig%2Egz |

|                            |            |                                                                                                                                                                                                                                                                                                                                                 |
|----------------------------|------------|-------------------------------------------------------------------------------------------------------------------------------------------------------------------------------------------------------------------------------------------------------------------------------------------------------------------------------------------------|
| Breast Myoepithelial Cells | GSM1127054 | <a href="ftp://ftp.ncbi.nlm.nih.gov/geo/samples/GSM1127nnn/GSM1127054/suppl/GSM1127054%5FUCSF%2DUBC%2EBreast%5FMyoepithelial%5FCells%2EBisulfite%2DSeq%2ERM066%2Ewig%2Egz">ftp://ftp.ncbi.nlm.nih.gov/geo/samples/GSM1127nnn/GSM1127054/suppl/GSM1127054%5FUCSF%2DUBC%2EBreast%5FMyoepithelial%5FCells%2EBisulfite%2DSeq%2ERM066%2Ewig%2Egz</a> |
| Breast Myoepithelial Cells | GSM1127057 | <a href="ftp://ftp.ncbi.nlm.nih.gov/geo/samples/GSM1127nnn/GSM1127057/suppl/GSM1127057%5FUCSF%2DUBC%2EBreast%5FMyoepithelial%5FCells%2EBisulfite%2DSeq%2ERM066%2Ewig%2Egz">ftp://ftp.ncbi.nlm.nih.gov/geo/samples/GSM1127nnn/GSM1127057/suppl/GSM1127057%5FUCSF%2DUBC%2EBreast%5FMyoepithelial%5FCells%2EBisulfite%2DSeq%2ERM066%2Ewig%2Egz</a> |
| Breast Myoepithelial Cells | GSM1127059 | <a href="ftp://ftp.ncbi.nlm.nih.gov/geo/samples/GSM1127nnn/GSM1127059/suppl/GSM1127059%5FUCSF%2DUBC%2EBreast%5FMyoepithelial%5FCells%2EBisulfite%2DSeq%2ERM066%2Ewig%2Egz">ftp://ftp.ncbi.nlm.nih.gov/geo/samples/GSM1127nnn/GSM1127059/suppl/GSM1127059%5FUCSF%2DUBC%2EBreast%5FMyoepithelial%5FCells%2EBisulfite%2DSeq%2ERM066%2Ewig%2Egz</a> |
| CD14 primary cells         | SRR1104848 | <a href="ftp://ftp.ncbi.nlm.nih.gov/sra/sra-instant/reads/ByRun/sra/SRR/SRR110/SRR1104848">ftp://ftp.ncbi.nlm.nih.gov/sra/sra-instant/reads/ByRun/sra/SRR/SRR110/SRR1104848</a>                                                                                                                                                                 |
| CD14 primary cells         | SRR1104855 | <a href="ftp://ftp.ncbi.nlm.nih.gov/sra/sra-instant/reads/ByRun/sra/SRR/SRR110/SRR1104855">ftp://ftp.ncbi.nlm.nih.gov/sra/sra-instant/reads/ByRun/sra/SRR/SRR110/SRR1104855</a>                                                                                                                                                                 |
| CD14 primary cells         | SRR1104856 | <a href="ftp://ftp.ncbi.nlm.nih.gov/sra/sra-instant/reads/ByRun/sra/SRR/SRR110/SRR1104856">ftp://ftp.ncbi.nlm.nih.gov/sra/sra-instant/reads/ByRun/sra/SRR/SRR110/SRR1104856</a>                                                                                                                                                                 |
| CD3 primary cells          | SRR1104838 | <a href="ftp://ftp.ncbi.nlm.nih.gov/sra/sra-instant/reads/ByRun/sra/SRR/SRR110/SRR1104838">ftp://ftp.ncbi.nlm.nih.gov/sra/sra-instant/reads/ByRun/sra/SRR/SRR110/SRR1104838</a>                                                                                                                                                                 |
| CD3 primary cells          | SRR1104839 | <a href="ftp://ftp.ncbi.nlm.nih.gov/sra/sra-instant/reads/ByRun/sra/SRR/SRR110/SRR1104839">ftp://ftp.ncbi.nlm.nih.gov/sra/sra-instant/reads/ByRun/sra/SRR/SRR110/SRR1104839</a>                                                                                                                                                                 |
| CD3 primary cells          | SRR1104841 | <a href="ftp://ftp.ncbi.nlm.nih.gov/sra/sra-instant/reads/ByRun/sra/SRR/SRR110/SRR1104841">ftp://ftp.ncbi.nlm.nih.gov/sra/sra-instant/reads/ByRun/sra/SRR/SRR110/SRR1104841</a>                                                                                                                                                                 |
| CD56 primary cells         | SRR1104851 | <a href="ftp://ftp.ncbi.nlm.nih.gov/sra/sra-instant/reads/ByRun/sra/SRR/SRR110/SRR1104851">ftp://ftp.ncbi.nlm.nih.gov/sra/sra-instant/reads/ByRun/sra/SRR/SRR110/SRR1104851</a>                                                                                                                                                                 |
| CD56 primary cells         | SRR1104862 | <a href="ftp://ftp.ncbi.nlm.nih.gov/sra/sra-instant/reads/ByRun/sra/SRR/SRR110/SRR1104862">ftp://ftp.ncbi.nlm.nih.gov/sra/sra-instant/reads/ByRun/sra/SRR/SRR110/SRR1104862</a>                                                                                                                                                                 |
| CD56 primary cells         | SRR1104863 | <a href="ftp://ftp.ncbi.nlm.nih.gov/sra/sra-instant/reads/ByRun/sra/SRR/SRR110/SRR1104863">ftp://ftp.ncbi.nlm.nih.gov/sra/sra-instant/reads/ByRun/sra/SRR/SRR110/SRR1104863</a>                                                                                                                                                                 |
| esophagus                  | SRR536241  | <a href="ftp://ftp.ncbi.nlm.nih.gov/sra/sra-instant/reads/ByRun/sra/SRR/SRR536/SRR536241">ftp://ftp.ncbi.nlm.nih.gov/sra/sra-instant/reads/ByRun/sra/SRR/SRR536/SRR536241</a>                                                                                                                                                                   |
| esophagus                  | SRR547638  | <a href="ftp://ftp.ncbi.nlm.nih.gov/sra/sra-instant/reads/ByRun/sra/SRR/SRR547/SRR547638">ftp://ftp.ncbi.nlm.nih.gov/sra/sra-instant/reads/ByRun/sra/SRR/SRR547/SRR547638</a>                                                                                                                                                                   |
| esophagus                  | SRR1045682 | <a href="ftp://ftp.ncbi.nlm.nih.gov/sra/sra-instant/reads/ByRun/sra/SRR/SRR104/SRR1045682">ftp://ftp.ncbi.nlm.nih.gov/sra/sra-instant/reads/ByRun/sra/SRR/SRR104/SRR1045682</a>                                                                                                                                                                 |
| gastric                    | SRR577621  | <a href="ftp://ftp.ncbi.nlm.nih.gov/sra/sra-instant/reads/ByRun/sra/SRR/SRR577/SRR577621">ftp://ftp.ncbi.nlm.nih.gov/sra/sra-instant/reads/ByRun/sra/SRR/SRR577/SRR577621</a>                                                                                                                                                                   |
| gastric                    | SRR1045750 | <a href="ftp://ftp.ncbi.nlm.nih.gov/sra/sra-instant/reads/ByRun/sra/SRR/SRR104/SRR1045750">ftp://ftp.ncbi.nlm.nih.gov/sra/sra-instant/reads/ByRun/sra/SRR/SRR104/SRR1045750</a>                                                                                                                                                                 |
| gastric                    | SRR1045749 | <a href="ftp://ftp.ncbi.nlm.nih.gov/sra/sra-instant/reads/ByRun/sra/SRR/SRR104/SRR1045749">ftp://ftp.ncbi.nlm.nih.gov/sra/sra-instant/reads/ByRun/sra/SRR/SRR104/SRR1045749</a>                                                                                                                                                                 |
| H1 +BMP4 cell line         | SRR067722  | <a href="ftp://ftp.ncbi.nlm.nih.gov/sra/sra-instant/reads/ByRun/sra/SRR/SRR067/SRR067722">ftp://ftp.ncbi.nlm.nih.gov/sra/sra-instant/reads/ByRun/sra/SRR/SRR067/SRR067722</a>                                                                                                                                                                   |
| H1 +BMP4 cell line         | SRR067729  | <a href="ftp://ftp.ncbi.nlm.nih.gov/sra/sra-instant/reads/ByRun/sra/SRR/SRR067/SRR067729">ftp://ftp.ncbi.nlm.nih.gov/sra/sra-instant/reads/ByRun/sra/SRR/SRR067/SRR067729</a>                                                                                                                                                                   |
| H1 +BMP4 cell line         | SRR067730  | <a href="ftp://ftp.ncbi.nlm.nih.gov/sra/sra-instant/reads/ByRun/sra/SRR/SRR067/SRR067730">ftp://ftp.ncbi.nlm.nih.gov/sra/sra-instant/reads/ByRun/sra/SRR/SRR067/SRR067730</a>                                                                                                                                                                   |

|                                               |            |                                                                                                                                                                                 |
|-----------------------------------------------|------------|---------------------------------------------------------------------------------------------------------------------------------------------------------------------------------|
| H1 BMP4 derived mesoderm cultured cells       | SRR364089  | <a href="ftp://ftp.ncbi.nlm.nih.gov/sra/sra-instant/reads/ByRun/sra/SRR/SRR364/SRR364089">ftp://ftp.ncbi.nlm.nih.gov/sra/sra-instant/reads/ByRun/sra/SRR/SRR364/SRR364089</a>   |
| H1 BMP4 derived mesoderm cultured cells       | SRR364317  | <a href="ftp://ftp.ncbi.nlm.nih.gov/sra/sra-instant/reads/ByRun/sra/SRR/SRR364/SRR364317">ftp://ftp.ncbi.nlm.nih.gov/sra/sra-instant/reads/ByRun/sra/SRR/SRR364/SRR364317</a>   |
| H1 BMP4 derived mesoderm cultured cells       | SRR364090  | <a href="ftp://ftp.ncbi.nlm.nih.gov/sra/sra-instant/reads/ByRun/sra/SRR/SRR364/SRR364090">ftp://ftp.ncbi.nlm.nih.gov/sra/sra-instant/reads/ByRun/sra/SRR/SRR364/SRR364090</a>   |
| H1 cell line                                  | SRR019072  | <a href="ftp://ftp.ncbi.nlm.nih.gov/sra/sra-instant/reads/ByRun/sra/SRR/SRR019/SRR019072">ftp://ftp.ncbi.nlm.nih.gov/sra/sra-instant/reads/ByRun/sra/SRR/SRR019/SRR019072</a>   |
| H1 cell line                                  | SRR018975  | <a href="ftp://ftp.ncbi.nlm.nih.gov/sra/sra-instant/reads/ByRun/sra/SRR/SRR018/SRR018975">ftp://ftp.ncbi.nlm.nih.gov/sra/sra-instant/reads/ByRun/sra/SRR/SRR018/SRR018975</a>   |
| H1 cell line                                  | SRR020282  | <a href="ftp://ftp.ncbi.nlm.nih.gov/sra/sra-instant/reads/ByRun/sra/SRR/SRR020/SRR020282">ftp://ftp.ncbi.nlm.nih.gov/sra/sra-instant/reads/ByRun/sra/SRR/SRR020/SRR020282</a>   |
| H1 derived mesenchymal stem cells             | SRR400557  | <a href="ftp://ftp.ncbi.nlm.nih.gov/sra/sra-instant/reads/ByRun/sra/SRR/SRR400/SRR400557">ftp://ftp.ncbi.nlm.nih.gov/sra/sra-instant/reads/ByRun/sra/SRR/SRR400/SRR400557</a>   |
| H1 derived mesenchymal stem cells             | SRR400558  | <a href="ftp://ftp.ncbi.nlm.nih.gov/sra/sra-instant/reads/ByRun/sra/SRR/SRR400/SRR400558">ftp://ftp.ncbi.nlm.nih.gov/sra/sra-instant/reads/ByRun/sra/SRR/SRR400/SRR400558</a>   |
| H1 derived mesenchymal stem cells             | SRR400566  | <a href="ftp://ftp.ncbi.nlm.nih.gov/sra/sra-instant/reads/ByRun/sra/SRR/SRR400/SRR400566">ftp://ftp.ncbi.nlm.nih.gov/sra/sra-instant/reads/ByRun/sra/SRR/SRR400/SRR400566</a>   |
| H1 derived neuronal progenitor cultured cells | SRR101296  | <a href="ftp://ftp.ncbi.nlm.nih.gov/sra/sra-instant/reads/ByRun/sra/SRR/SRR101/SRR101296">ftp://ftp.ncbi.nlm.nih.gov/sra/sra-instant/reads/ByRun/sra/SRR/SRR101/SRR101296</a>   |
| H1 derived neuronal progenitor cultured cells | SRR101297  | <a href="ftp://ftp.ncbi.nlm.nih.gov/sra/sra-instant/reads/ByRun/sra/SRR/SRR101/SRR101297">ftp://ftp.ncbi.nlm.nih.gov/sra/sra-instant/reads/ByRun/sra/SRR/SRR101/SRR101297</a>   |
| H1 derived neuronal progenitor cultured cells | SRR101298  | <a href="ftp://ftp.ncbi.nlm.nih.gov/sra/sra-instant/reads/ByRun/sra/SRR/SRR101/SRR101298">ftp://ftp.ncbi.nlm.nih.gov/sra/sra-instant/reads/ByRun/sra/SRR/SRR101/SRR101298</a>   |
| H9 cell line                                  | SRR179602  | <a href="ftp://ftp.ncbi.nlm.nih.gov/sra/sra-instant/reads/ByRun/sra/SRR/SRR179/SRR179602">ftp://ftp.ncbi.nlm.nih.gov/sra/sra-instant/reads/ByRun/sra/SRR/SRR179/SRR179602</a>   |
| H9 cell line                                  | SRR179638  | <a href="ftp://ftp.ncbi.nlm.nih.gov/sra/sra-instant/reads/ByRun/sra/SRR/SRR179/SRR179638">ftp://ftp.ncbi.nlm.nih.gov/sra/sra-instant/reads/ByRun/sra/SRR/SRR179/SRR179638</a>   |
| H9 cell line                                  | SRR179668  | <a href="ftp://ftp.ncbi.nlm.nih.gov/sra/sra-instant/reads/ByRun/sra/SRR/SRR179/SRR179668">ftp://ftp.ncbi.nlm.nih.gov/sra/sra-instant/reads/ByRun/sra/SRR/SRR179/SRR179668</a>   |
| heart aorta                                   | SRR536239  | <a href="ftp://ftp.ncbi.nlm.nih.gov/sra/sra-instant/reads/ByRun/sra/SRR/SRR536/SRR536239">ftp://ftp.ncbi.nlm.nih.gov/sra/sra-instant/reads/ByRun/sra/SRR/SRR536/SRR536239</a>   |
| heart aorta                                   | SRR1045736 | <a href="ftp://ftp.ncbi.nlm.nih.gov/sra/sra-instant/reads/ByRun/sra/SRR/SRR104/SRR1045736">ftp://ftp.ncbi.nlm.nih.gov/sra/sra-instant/reads/ByRun/sra/SRR/SRR104/SRR1045736</a> |
| heart aorta                                   | SRR1045738 | <a href="ftp://ftp.ncbi.nlm.nih.gov/sra/sra-instant/reads/ByRun/sra/SRR/SRR104/SRR1045738">ftp://ftp.ncbi.nlm.nih.gov/sra/sra-instant/reads/ByRun/sra/SRR/SRR104/SRR1045738</a> |
| heart left ventricle                          | SRR536242  | <a href="ftp://ftp.ncbi.nlm.nih.gov/sra/sra-instant/reads/ByRun/sra/SRR/SRR536/SRR536242">ftp://ftp.ncbi.nlm.nih.gov/sra/sra-instant/reads/ByRun/sra/SRR/SRR536/SRR536242</a>   |

|                                             |            |                                                                                                                                                                                 |
|---------------------------------------------|------------|---------------------------------------------------------------------------------------------------------------------------------------------------------------------------------|
| heart left ventricle                        | SRR578655  | <a href="ftp://ftp.ncbi.nlm.nih.gov/sra/sra-instant/reads/ByRun/sra/SRR/SRR578/SRR578655">ftp://ftp.ncbi.nlm.nih.gov/sra/sra-instant/reads/ByRun/sra/SRR/SRR578/SRR578655</a>   |
| heart left ventricle                        | SRR1045642 | <a href="ftp://ftp.ncbi.nlm.nih.gov/sra/sra-instant/reads/ByRun/sra/SRR/SRR104/SRR1045642">ftp://ftp.ncbi.nlm.nih.gov/sra/sra-instant/reads/ByRun/sra/SRR/SRR104/SRR1045642</a> |
| heart right atrium                          | SRR577629  | <a href="ftp://ftp.ncbi.nlm.nih.gov/sra/sra-instant/reads/ByRun/sra/SRR/SRR577/SRR577629">ftp://ftp.ncbi.nlm.nih.gov/sra/sra-instant/reads/ByRun/sra/SRR/SRR577/SRR577629</a>   |
| heart right atrium                          | SRR1045753 | <a href="ftp://ftp.ncbi.nlm.nih.gov/sra/sra-instant/reads/ByRun/sra/SRR/SRR104/SRR1045753">ftp://ftp.ncbi.nlm.nih.gov/sra/sra-instant/reads/ByRun/sra/SRR/SRR104/SRR1045753</a> |
| heart right atrium                          | SRR1045752 | <a href="ftp://ftp.ncbi.nlm.nih.gov/sra/sra-instant/reads/ByRun/sra/SRR/SRR104/SRR1045752">ftp://ftp.ncbi.nlm.nih.gov/sra/sra-instant/reads/ByRun/sra/SRR/SRR104/SRR1045752</a> |
| heart right ventricle                       | SRR577634  | <a href="ftp://ftp.ncbi.nlm.nih.gov/sra/sra-instant/reads/ByRun/sra/SRR/SRR577/SRR577634">ftp://ftp.ncbi.nlm.nih.gov/sra/sra-instant/reads/ByRun/sra/SRR/SRR577/SRR577634</a>   |
| heart right ventricle                       | SRR651709  | <a href="ftp://ftp.ncbi.nlm.nih.gov/sra/sra-instant/reads/ByRun/sra/SRR/SRR651/SRR651709">ftp://ftp.ncbi.nlm.nih.gov/sra/sra-instant/reads/ByRun/sra/SRR/SRR651/SRR651709</a>   |
| heart right ventricle                       | SRR1045756 | <a href="ftp://ftp.ncbi.nlm.nih.gov/sra/sra-instant/reads/ByRun/sra/SRR/SRR104/SRR1045756">ftp://ftp.ncbi.nlm.nih.gov/sra/sra-instant/reads/ByRun/sra/SRR/SRR104/SRR1045756</a> |
| hESC-derived CD184+ endoderm cultured cells | SRR1143696 | <a href="ftp://ftp.ncbi.nlm.nih.gov/sra/sra-instant/reads/ByRun/sra/SRR/SRR114/SRR1143696">ftp://ftp.ncbi.nlm.nih.gov/sra/sra-instant/reads/ByRun/sra/SRR/SRR114/SRR1143696</a> |
| hESC-derived CD184+ endoderm cultured cells | SRR1143697 | <a href="ftp://ftp.ncbi.nlm.nih.gov/sra/sra-instant/reads/ByRun/sra/SRR/SRR114/SRR1143697">ftp://ftp.ncbi.nlm.nih.gov/sra/sra-instant/reads/ByRun/sra/SRR/SRR114/SRR1143697</a> |
| hESC-derived CD184+ endoderm cultured cells | SRR1067575 | <a href="ftp://ftp.ncbi.nlm.nih.gov/sra/sra-instant/reads/ByRun/sra/SRR/SRR106/SRR1067575">ftp://ftp.ncbi.nlm.nih.gov/sra/sra-instant/reads/ByRun/sra/SRR/SRR106/SRR1067575</a> |
| hESC-derived CD56+ ectoderm cultured cells  | SRR1067550 | <a href="ftp://ftp.ncbi.nlm.nih.gov/sra/sra-instant/reads/ByRun/sra/SRR/SRR106/SRR1067550">ftp://ftp.ncbi.nlm.nih.gov/sra/sra-instant/reads/ByRun/sra/SRR/SRR106/SRR1067550</a> |
| hESC-derived CD56+ ectoderm cultured cells  | SRR1067553 | <a href="ftp://ftp.ncbi.nlm.nih.gov/sra/sra-instant/reads/ByRun/sra/SRR/SRR106/SRR1067553">ftp://ftp.ncbi.nlm.nih.gov/sra/sra-instant/reads/ByRun/sra/SRR/SRR106/SRR1067553</a> |
| hESC-derived CD56+ ectoderm cultured cells  | SRR1067572 | <a href="ftp://ftp.ncbi.nlm.nih.gov/sra/sra-instant/reads/ByRun/sra/SRR/SRR106/SRR1067572">ftp://ftp.ncbi.nlm.nih.gov/sra/sra-instant/reads/ByRun/sra/SRR/SRR106/SRR1067572</a> |
| hESC-derived CD56+ mesoderm cultured cells  | SRR1067566 | <a href="ftp://ftp.ncbi.nlm.nih.gov/sra/sra-instant/reads/ByRun/sra/SRR/SRR106/SRR1067566">ftp://ftp.ncbi.nlm.nih.gov/sra/sra-instant/reads/ByRun/sra/SRR/SRR106/SRR1067566</a> |
| hESC-derived CD56+ mesoderm cultured cells  | SRR1067568 | <a href="ftp://ftp.ncbi.nlm.nih.gov/sra/sra-instant/reads/ByRun/sra/SRR/SRR106/SRR1067568">ftp://ftp.ncbi.nlm.nih.gov/sra/sra-instant/reads/ByRun/sra/SRR/SRR106/SRR1067568</a> |

|                                            |            |                                                                                                                                                                                 |
|--------------------------------------------|------------|---------------------------------------------------------------------------------------------------------------------------------------------------------------------------------|
| hESC-derived CD56+ mesoderm cultured cells | SRR1067558 | <a href="ftp://ftp.ncbi.nlm.nih.gov/sra/sra-instant/reads/ByRun/sra/SRR/SRR106/SRR1067558">ftp://ftp.ncbi.nlm.nih.gov/sra/sra-instant/reads/ByRun/sra/SRR/SRR106/SRR1067558</a> |
| HUES64 cell line                           | SRR1067557 | <a href="ftp://ftp.ncbi.nlm.nih.gov/sra/sra-instant/reads/ByRun/sra/SRR/SRR106/SRR1067557">ftp://ftp.ncbi.nlm.nih.gov/sra/sra-instant/reads/ByRun/sra/SRR/SRR106/SRR1067557</a> |
| HUES64 cell line                           | SRR1067560 | <a href="ftp://ftp.ncbi.nlm.nih.gov/sra/sra-instant/reads/ByRun/sra/SRR/SRR106/SRR1067560">ftp://ftp.ncbi.nlm.nih.gov/sra/sra-instant/reads/ByRun/sra/SRR/SRR106/SRR1067560</a> |
| HUES64 cell line                           | SRR1067578 | <a href="ftp://ftp.ncbi.nlm.nih.gov/sra/sra-instant/reads/ByRun/sra/SRR/SRR106/SRR1067578">ftp://ftp.ncbi.nlm.nih.gov/sra/sra-instant/reads/ByRun/sra/SRR/SRR106/SRR1067578</a> |
| IMR90 cell line                            | SRR019650  | <a href="ftp://ftp.ncbi.nlm.nih.gov/sra/sra-instant/reads/ByRun/sra/SRR/SRR019/SRR019650">ftp://ftp.ncbi.nlm.nih.gov/sra/sra-instant/reads/ByRun/sra/SRR/SRR019/SRR019650</a>   |
| IMR90 cell line                            | SRR020121  | <a href="ftp://ftp.ncbi.nlm.nih.gov/sra/sra-instant/reads/ByRun/sra/SRR/SRR020/SRR020121">ftp://ftp.ncbi.nlm.nih.gov/sra/sra-instant/reads/ByRun/sra/SRR/SRR020/SRR020121</a>   |
| IMR90 cell line                            | SRR020102  | <a href="ftp://ftp.ncbi.nlm.nih.gov/sra/sra-instant/reads/ByRun/sra/SRR/SRR020/SRR020102">ftp://ftp.ncbi.nlm.nih.gov/sra/sra-instant/reads/ByRun/sra/SRR/SRR020/SRR020102</a>   |
| iPS DF 19.11 cell line                     | SRR179609  | <a href="ftp://ftp.ncbi.nlm.nih.gov/sra/sra-instant/reads/ByRun/sra/SRR/SRR179/SRR179609">ftp://ftp.ncbi.nlm.nih.gov/sra/sra-instant/reads/ByRun/sra/SRR/SRR179/SRR179609</a>   |
| iPS DF 19.11 cell line                     | SRR179610  | <a href="ftp://ftp.ncbi.nlm.nih.gov/sra/sra-instant/reads/ByRun/sra/SRR/SRR179/SRR179610">ftp://ftp.ncbi.nlm.nih.gov/sra/sra-instant/reads/ByRun/sra/SRR/SRR179/SRR179610</a>   |
| iPS DF 19.11 cell line                     | SRR179611  | <a href="ftp://ftp.ncbi.nlm.nih.gov/sra/sra-instant/reads/ByRun/sra/SRR/SRR179/SRR179611">ftp://ftp.ncbi.nlm.nih.gov/sra/sra-instant/reads/ByRun/sra/SRR/SRR179/SRR179611</a>   |
| iPS DF 6.9 cell line                       | SRR179595  | <a href="ftp://ftp.ncbi.nlm.nih.gov/sra/sra-instant/reads/ByRun/sra/SRR/SRR179/SRR179595">ftp://ftp.ncbi.nlm.nih.gov/sra/sra-instant/reads/ByRun/sra/SRR/SRR179/SRR179595</a>   |
| iPS DF 6.9 cell line                       | SRR179596  | <a href="ftp://ftp.ncbi.nlm.nih.gov/sra/sra-instant/reads/ByRun/sra/SRR/SRR179/SRR179596">ftp://ftp.ncbi.nlm.nih.gov/sra/sra-instant/reads/ByRun/sra/SRR/SRR179/SRR179596</a>   |
| iPS DF 6.9 cell line                       | SRR179615  | <a href="ftp://ftp.ncbi.nlm.nih.gov/sra/sra-instant/reads/ByRun/sra/SRR/SRR179/SRR179615">ftp://ftp.ncbi.nlm.nih.gov/sra/sra-instant/reads/ByRun/sra/SRR/SRR179/SRR179615</a>   |
| large intestine                            | SRR770593  | <a href="ftp://ftp.ncbi.nlm.nih.gov/sra/sra-instant/reads/ByRun/sra/SRR/SRR770/SRR770593">ftp://ftp.ncbi.nlm.nih.gov/sra/sra-instant/reads/ByRun/sra/SRR/SRR770/SRR770593</a>   |
| large intestine                            | SRR770594  | <a href="ftp://ftp.ncbi.nlm.nih.gov/sra/sra-instant/reads/ByRun/sra/SRR/SRR770/SRR770594">ftp://ftp.ncbi.nlm.nih.gov/sra/sra-instant/reads/ByRun/sra/SRR/SRR770/SRR770594</a>   |
| large intestine                            | SRR770595  | <a href="ftp://ftp.ncbi.nlm.nih.gov/sra/sra-instant/reads/ByRun/sra/SRR/SRR770/SRR770595">ftp://ftp.ncbi.nlm.nih.gov/sra/sra-instant/reads/ByRun/sra/SRR/SRR770/SRR770595</a>   |
| liver                                      | SRR641603  | <a href="ftp://ftp.ncbi.nlm.nih.gov/sra/sra-instant/reads/ByRun/sra/SRR/SRR641/SRR641603">ftp://ftp.ncbi.nlm.nih.gov/sra/sra-instant/reads/ByRun/sra/SRR/SRR641/SRR641603</a>   |
| liver                                      | SRR641604  | <a href="ftp://ftp.ncbi.nlm.nih.gov/sra/sra-instant/reads/ByRun/sra/SRR/SRR641/SRR641604">ftp://ftp.ncbi.nlm.nih.gov/sra/sra-instant/reads/ByRun/sra/SRR/SRR641/SRR641604</a>   |
| liver                                      | SRR641605  | <a href="ftp://ftp.ncbi.nlm.nih.gov/sra/sra-instant/reads/ByRun/sra/SRR/SRR641/SRR641605">ftp://ftp.ncbi.nlm.nih.gov/sra/sra-instant/reads/ByRun/sra/SRR/SRR641/SRR641605</a>   |
| lung                                       | SRR536237  | <a href="ftp://ftp.ncbi.nlm.nih.gov/sra/sra-instant/reads/ByRun/sra/SRR/SRR536/SRR536237">ftp://ftp.ncbi.nlm.nih.gov/sra/sra-instant/reads/ByRun/sra/SRR/SRR536/SRR536237</a>   |
| lung                                       | SRR536238  | <a href="ftp://ftp.ncbi.nlm.nih.gov/sra/sra-instant/reads/ByRun/sra/SRR/SRR536/SRR536238">ftp://ftp.ncbi.nlm.nih.gov/sra/sra-instant/reads/ByRun/sra/SRR/SRR536/SRR536238</a>   |
| lung                                       | SRR1045636 | <a href="ftp://ftp.ncbi.nlm.nih.gov/sra/sra-instant/reads/ByRun/sra/SRR/SRR104/SRR1045636">ftp://ftp.ncbi.nlm.nih.gov/sra/sra-instant/reads/ByRun/sra/SRR/SRR104/SRR1045636</a> |
| muscle leg                                 | SRR1067579 | <a href="ftp://ftp.ncbi.nlm.nih.gov/sra/sra-instant/reads/ByRun/sra/SRR/SRR106/SRR1067579">ftp://ftp.ncbi.nlm.nih.gov/sra/sra-instant/reads/ByRun/sra/SRR/SRR106/SRR1067579</a> |
| muscle leg                                 | SRR1067581 | <a href="ftp://ftp.ncbi.nlm.nih.gov/sra/sra-instant/reads/ByRun/sra/SRR/SRR106/SRR1067581">ftp://ftp.ncbi.nlm.nih.gov/sra/sra-instant/reads/ByRun/sra/SRR/SRR106/SRR1067581</a> |

|                                                        |            |                                                                                                                                                                                                                 |
|--------------------------------------------------------|------------|-----------------------------------------------------------------------------------------------------------------------------------------------------------------------------------------------------------------|
| muscle leg                                             | SRR1067584 | ftp://ftp.ncbi.nlm.nih.gov/sra/sra-instant/reads/ByRun/sra/SRR/SRR106/SRR1067584                                                                                                                                |
| muscle trunk                                           | SRR1104843 | ftp://ftp.ncbi.nlm.nih.gov/sra/sra-instant/reads/ByRun/sra/SRR/SRR110/SRR1104843                                                                                                                                |
| muscle trunk                                           | SRR1104844 | ftp://ftp.ncbi.nlm.nih.gov/sra/sra-instant/reads/ByRun/sra/SRR/SRR110/SRR1104844                                                                                                                                |
| muscle trunk                                           | SRR1104849 | ftp://ftp.ncbi.nlm.nih.gov/sra/sra-instant/reads/ByRun/sra/SRR/SRR110/SRR1104849                                                                                                                                |
| Neurosphere Cultured Cells Cortex Derived              | GSM1127118 | ftp://ftp.ncbi.nlm.nih.gov/geo/samples/GSM1127nnn/GSM1127118/suppl/GSM1127118%5FUUCSF%2DUBC%2ENeurosphere%5FCultured%5FCells%5FCortex%5FDerived%2EBisulfite%2DSeq%2EHuFNSCO2%2Ewig%2Egz                         |
| Neurosphere Cultured Cells Cortex Derived              | GSM1127124 | ftp://ftp.ncbi.nlm.nih.gov/geo/samples/GSM1127nnn/GSM1127124/suppl/GSM1127124%5FUUCSF%2DUBC%2ENeurosphere%5FCultured%5FCells%5FCortex%5FDerived%2EBisulfite%2DSeq%2EHuFNSCO4%2Ewig%2Egz                         |
| Neurosphere Cultured Cells Ganglionic Eminence Derived | GSM1127055 | ftp://ftp.ncbi.nlm.nih.gov/geo/samples/GSM1127nnn/GSM1127055/suppl/GSM1127055%5FUUCSF%2DUBC%2ENeurosphere%5FCultured%5FCells%5FGanglionic%5FEminence%5FDerived%2EBisulfite%2DSeq%2EHuFNSCO2%2EA17784%2Ewig%2Egz |
| Neurosphere Cultured Cells Ganglionic Eminence Derived | GSM1127121 | ftp://ftp.ncbi.nlm.nih.gov/geo/samples/GSM1127nnn/GSM1127121/suppl/GSM1127121%5FUUCSF%2DUBC%2ENeurosphere%5FCultured%5FCells%5FGanglionic%5FEminence%5FDerived%2EBisulfite%2DSeq%2EHuFNSCO4%2Ewig%2Egz          |
| Neurosphere Cultured Cells Ganglionic Eminence Derived | GSM941746  | ftp://ftp.ncbi.nlm.nih.gov/geo/samples/GSM941nnn/GSM941746/suppl/GSM941746%5FUUCSF%2DUBC%2ENeurosphere%5FCultured%5FCells%5FGanglionic%5FEminence%5FDerived%2EBisulfite%2DSeq%2EHuFNSCO2%2EA13819%2Ewig%2Egz    |
| ovary                                                  | SRR577609  | ftp://ftp.ncbi.nlm.nih.gov/sra/sra-instant/reads/ByRun/sra/SRR/SRR577/SRR577609                                                                                                                                 |
| ovary                                                  | SRR577610  | ftp://ftp.ncbi.nlm.nih.gov/sra/sra-instant/reads/ByRun/sra/SRR/SRR577/SRR577610                                                                                                                                 |
| ovary                                                  | SRR1045705 | ftp://ftp.ncbi.nlm.nih.gov/sra/sra-instant/reads/ByRun/sra/SRR/SRR104/SRR1045705                                                                                                                                |
| pancreas                                               | SRR536245  | ftp://ftp.ncbi.nlm.nih.gov/sra/sra-instant/reads/ByRun/sra/SRR/SRR536/SRR536245                                                                                                                                 |
| pancreas                                               | SRR536246  | ftp://ftp.ncbi.nlm.nih.gov/sra/sra-instant/reads/ByRun/sra/SRR/SRR536/SRR536246                                                                                                                                 |
| pancreas                                               | SRR1045706 | ftp://ftp.ncbi.nlm.nih.gov/sra/sra-instant/reads/ByRun/sra/SRR/SRR104/SRR1045706                                                                                                                                |
| Penis Foreskin Fibroblast Primary Cells                | GSM1127120 | ftp://ftp.ncbi.nlm.nih.gov/geo/samples/GSM1127nnn/GSM1127120/suppl/GSM1127120%5FUUCSF%2DUBC%2EPenis%5FForeskin%5FFibroblast%5FPrimary%5FCells%2EBisulfite%2DSeq%2Eskin03%2Ewig%2Egz                             |

|                                                 |            |                                                                                                                                                                                                   |
|-------------------------------------------------|------------|---------------------------------------------------------------------------------------------------------------------------------------------------------------------------------------------------|
| Penis Foreskin<br>Keratinocyte<br>Primary Cells | GSM1127056 | ftp://ftp.ncbi.nlm.nih.gov/geo/samples/GSM1127nnn/<br>GSM1127056/suppl/GSM1127056%5FUUCSF%2DUBC%<br>2EPenis%5FForeskin%5FKeratinocyte%5FPrimary%<br>5FCells%2EBisulfite%2DSeq%2Eskin03%2Ewig%2Egz |
| Penis Foreskin<br>Keratinocyte<br>Primary Cells | GSM1127058 | ftp://ftp.ncbi.nlm.nih.gov/geo/samples/GSM1127nnn/<br>GSM1127058/suppl/GSM1127058%5FUUCSF%2DUBC%<br>2EPenis%5FForeskin%5FKeratinocyte%5FPrimary%<br>5FCells%2EBisulfite%2DSeq%2Eskin03%2Ewig%2Egz |
| placenta                                        | SRR1104861 | ftp://ftp.ncbi.nlm.nih.gov/sra/sra-instant/<br>reads/ByRun/sra/SRR/SRR110/SRR1104861                                                                                                              |
| placenta                                        | SRR1104865 | ftp://ftp.ncbi.nlm.nih.gov/sra/sra-instant/<br>reads/ByRun/sra/SRR/SRR110/SRR1104865                                                                                                              |
| placenta                                        | SRR1104866 | ftp://ftp.ncbi.nlm.nih.gov/sra/sra-instant/<br>reads/ByRun/sra/SRR/SRR110/SRR1104866                                                                                                              |
| psoas muscle                                    | SRR577625  | ftp://ftp.ncbi.nlm.nih.gov/sra/sra-instant/<br>reads/ByRun/sra/SRR/SRR577/SRR577625                                                                                                               |
| psoas muscle                                    | SRR1045645 | ftp://ftp.ncbi.nlm.nih.gov/sra/sra-instant/<br>reads/ByRun/sra/SRR/SRR104/SRR1045645                                                                                                              |
| psoas muscle                                    | SRR1045712 | ftp://ftp.ncbi.nlm.nih.gov/sra/sra-instant/<br>reads/ByRun/sra/SRR/SRR104/SRR1045712                                                                                                              |
| sigmoid colon                                   | SRR536234  | ftp://ftp.ncbi.nlm.nih.gov/sra/sra-instant/<br>reads/ByRun/sra/SRR/SRR536/SRR536234                                                                                                               |
| sigmoid colon                                   | SRR536235  | ftp://ftp.ncbi.nlm.nih.gov/sra/sra-instant/<br>reads/ByRun/sra/SRR/SRR536/SRR536235                                                                                                               |
| sigmoid colon                                   | SRR577638  | ftp://ftp.ncbi.nlm.nih.gov/sra/sra-instant/<br>reads/ByRun/sra/SRR/SRR577/SRR577638                                                                                                               |
| small intestine                                 | SRR536231  | ftp://ftp.ncbi.nlm.nih.gov/sra/sra-instant/<br>reads/ByRun/sra/SRR/SRR536/SRR536231                                                                                                               |
| small intestine                                 | SRR1045659 | ftp://ftp.ncbi.nlm.nih.gov/sra/sra-instant/<br>reads/ByRun/sra/SRR/SRR104/SRR1045659                                                                                                              |
| small intestine                                 | SRR1045718 | ftp://ftp.ncbi.nlm.nih.gov/sra/sra-instant/<br>reads/ByRun/sra/SRR/SRR104/SRR1045718                                                                                                              |
| spinal cord                                     | SRR1104845 | ftp://ftp.ncbi.nlm.nih.gov/sra/sra-instant/<br>reads/ByRun/sra/SRR/SRR110/SRR1104845                                                                                                              |
| spinal cord                                     | SRR1104860 | ftp://ftp.ncbi.nlm.nih.gov/sra/sra-instant/<br>reads/ByRun/sra/SRR/SRR110/SRR1104860                                                                                                              |
| spinal cord                                     | SRR1104864 | ftp://ftp.ncbi.nlm.nih.gov/sra/sra-instant/<br>reads/ByRun/sra/SRR/SRR110/SRR1104864                                                                                                              |
| spleen                                          | SRR536247  | ftp://ftp.ncbi.nlm.nih.gov/sra/sra-instant/<br>reads/ByRun/sra/SRR/SRR536/SRR536247                                                                                                               |
| spleen                                          | SRR1045660 | ftp://ftp.ncbi.nlm.nih.gov/sra/sra-instant/<br>reads/ByRun/sra/SRR/SRR104/SRR1045660                                                                                                              |
| spleen                                          | SRR1045724 | ftp://ftp.ncbi.nlm.nih.gov/sra/sra-instant/<br>reads/ByRun/sra/SRR/SRR104/SRR1045724                                                                                                              |
| stomach                                         | SRR1104840 | ftp://ftp.ncbi.nlm.nih.gov/sra/sra-instant/<br>reads/ByRun/sra/SRR/SRR110/SRR1104840                                                                                                              |
| stomach                                         | SRR1104846 | ftp://ftp.ncbi.nlm.nih.gov/sra/sra-instant/<br>reads/ByRun/sra/SRR/SRR110/SRR1104846                                                                                                              |



|                                 |            |                                                                                                                                                                                                                                                                                                                 |
|---------------------------------|------------|-----------------------------------------------------------------------------------------------------------------------------------------------------------------------------------------------------------------------------------------------------------------------------------------------------------------|
| stomach                         | SRR1104847 | <a href="ftp://ftp.ncbi.nlm.nih.gov/sra/sra-instant/reads/ByRun/sra/SRR/SRR110/SRR1104847">ftp://ftp.ncbi.nlm.nih.gov/sra/sra-instant/reads/ByRun/sra/SRR/SRR110/SRR1104847</a>                                                                                                                                 |
| thymus                          | SRR577606  | <a href="ftp://ftp.ncbi.nlm.nih.gov/sra/sra-instant/reads/ByRun/sra/SRR/SRR577/SRR577606">ftp://ftp.ncbi.nlm.nih.gov/sra/sra-instant/reads/ByRun/sra/SRR/SRR577/SRR577606</a>                                                                                                                                   |
| thymus                          | SRR1045667 | <a href="ftp://ftp.ncbi.nlm.nih.gov/sra/sra-instant/reads/ByRun/sra/SRR/SRR104/SRR1045667">ftp://ftp.ncbi.nlm.nih.gov/sra/sra-instant/reads/ByRun/sra/SRR/SRR104/SRR1045667</a>                                                                                                                                 |
| thymus                          | SRR1067580 | <a href="ftp://ftp.ncbi.nlm.nih.gov/sra/sra-instant/reads/ByRun/sra/SRR/SRR106/SRR1067580">ftp://ftp.ncbi.nlm.nih.gov/sra/sra-instant/reads/ByRun/sra/SRR/SRR106/SRR1067580</a>                                                                                                                                 |
| UCSF-4 embryonic stem cell line | GSM1127122 | <a href="ftp://ftp.ncbi.nlm.nih.gov/geo/samples/GSM1127nnn/GSM1127122/suppl/GSM1127122%5FUUCSF%2DUBC%2EUCSF%2D4star%2EBisulfite%2DSeq%2EA21771%2Ewig%2Egz">ftp://ftp.ncbi.nlm.nih.gov/geo/samples/GSM1127nnn/GSM1127122/suppl/GSM1127122%5FUUCSF%2DUBC%2EUCSF%2D4star%2EBisulfite%2DSeq%2EA21771%2Ewig%2Egz</a> |
| UCSF-4 embryonic stem cell line | GSM1127123 | <a href="ftp://ftp.ncbi.nlm.nih.gov/geo/samples/GSM1127nnn/GSM1127123/suppl/GSM1127123%5FUUCSF%2DUBC%2EUCSF%2D4star%2EBisulfite%2DSeq%2EA21772%2Ewig%2Egz">ftp://ftp.ncbi.nlm.nih.gov/geo/samples/GSM1127nnn/GSM1127123/suppl/GSM1127123%5FUUCSF%2DUBC%2EUCSF%2D4star%2EBisulfite%2DSeq%2EA21772%2Ewig%2Egz</a> |
